# Supplementary material for: The CRL5–SPSB3 ubiquitin ligase targets nuclear cGAS for degradation
Source: PubMed Central journal article supplement (PMC10972748; doi:10.1038/s41586-024-07112-w), 2024-02-28
Supplement: 41586_2024_7112_MOESM1_ESM.pdf [file 41586_2024_7112_MOESM1_ESM.pdf]

---

**Supplementary information**

---

**The CRL5–SPSB3 ubiquitin ligase targets nuclear cGAS for degradation**

---

In the format provided by the authors and unedited

## The CRL5<sup>SPSB3</sup> ubiquitin ligase targets nuclear cGAS for degradation

Pengbiao Xu<sup>1,3</sup>, Ying Liu<sup>1,3</sup>, Chong Liu<sup>1,3</sup>, Baptiste Guey<sup>1</sup>, Lingyun Li<sup>1</sup>, Pauline Melene<sup>1</sup>, Jonathan Ricci<sup>1</sup> & Andrea Ablasser<sup>1,2,\*</sup>

<sup>1</sup> Global Health Institute, Swiss Federal Institute of Technology Lausanne (EPFL), Lausanne, Switzerland

<sup>2</sup> Institute for Cancer Research (ISREC), Swiss Federal Institute of Technology Lausanne (EPFL), Lausanne, Switzerland

<sup>3</sup> These authors contributed equally: Pengbiao Xu, Ying Liu, Chong Liu

\* Correspondence: [andrea.ablasser@epfl.ch](mailto:andrea.ablasser@epfl.ch)

Supplementary Figure 1 | Full scans for all immunoblots and Coomassie Blue stainings.

Supplementary Figure 2 | Flow cytometric gating strategy



**Fig.1**

**i**

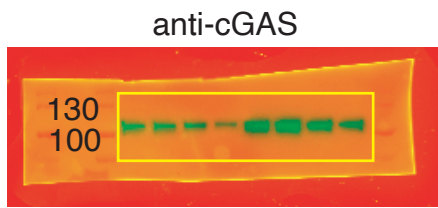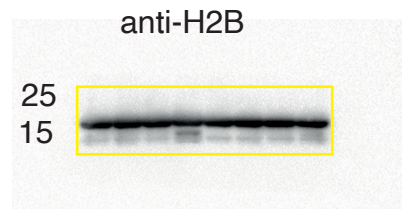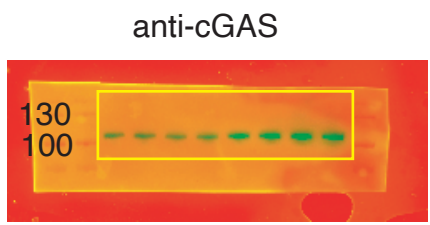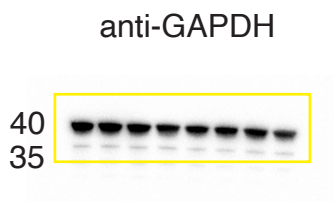

**j**

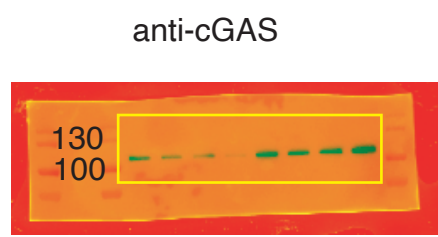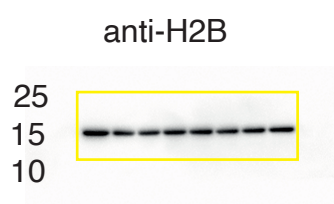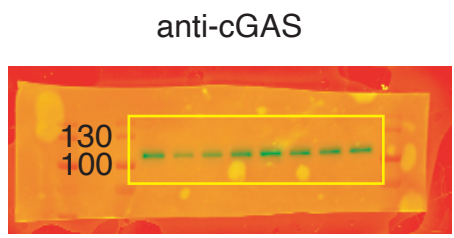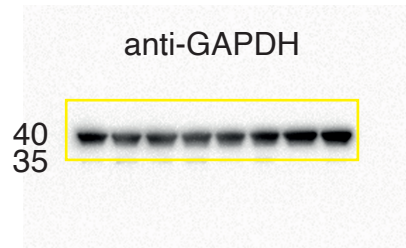

**Fig.2**

**a**

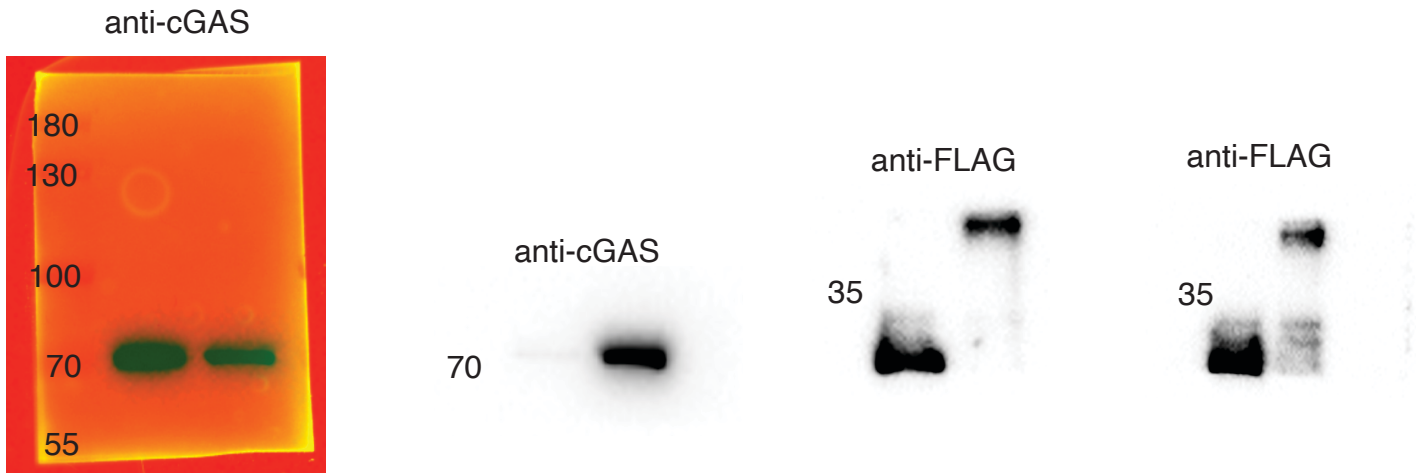

**b**

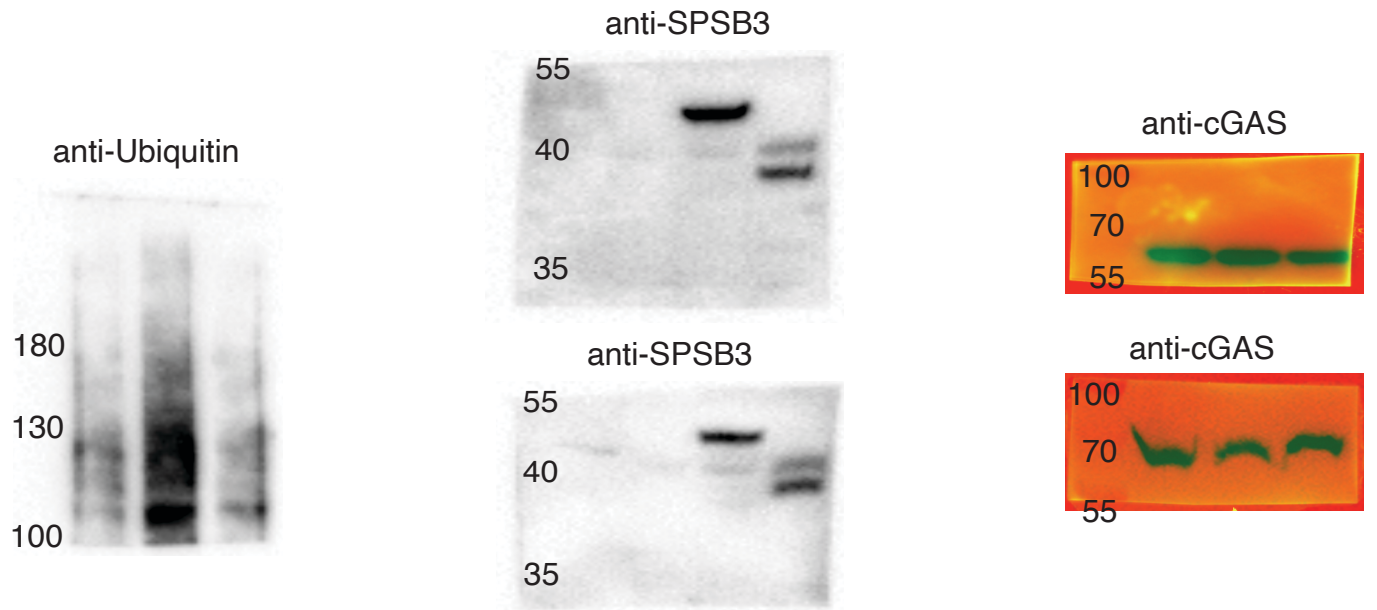

**c**

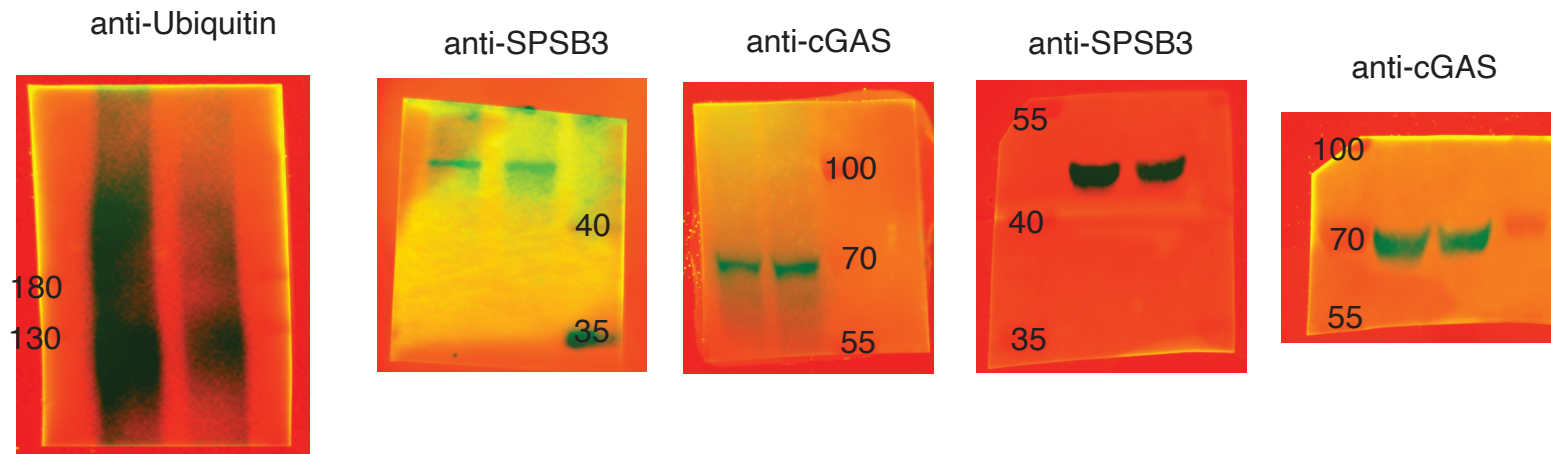

**Fig.2**

**d**

anti-k48Ubiquitin

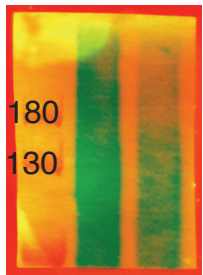

anti-SPSB3

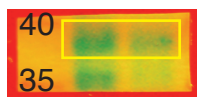

anti-cGAS

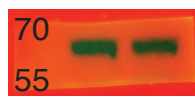

anti-SPSB3

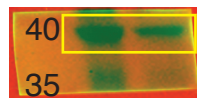

anti-cGAS

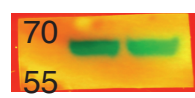

anti-Vinculin

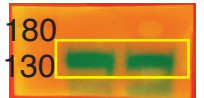

**e**

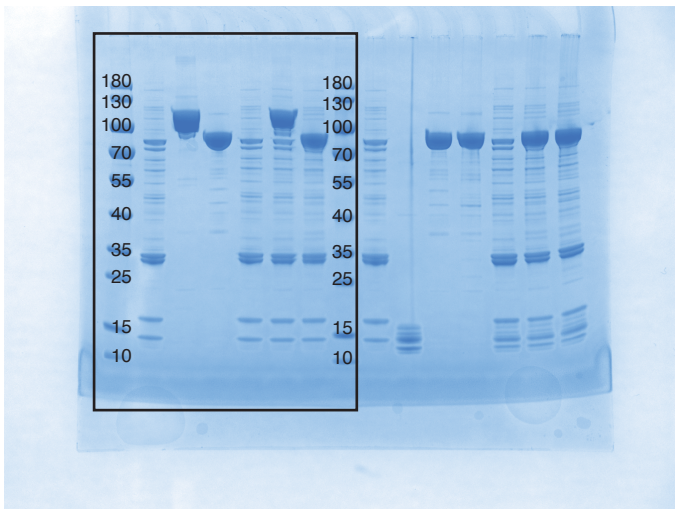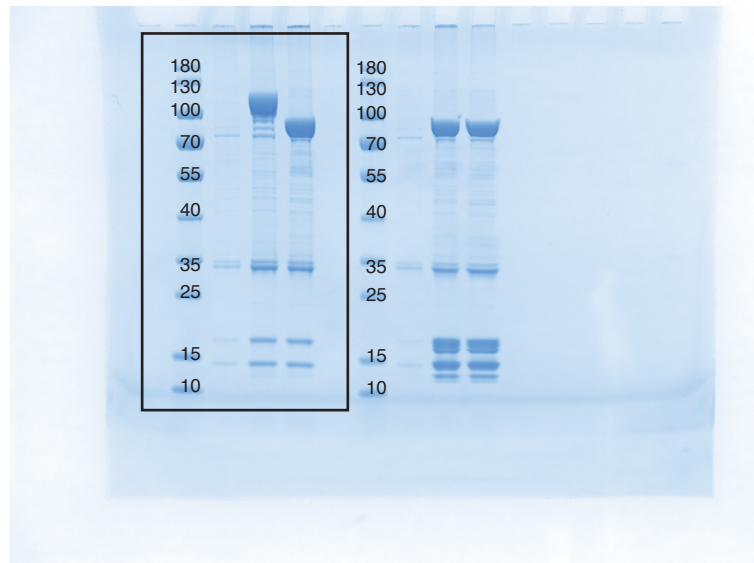

**f**

anti-cGAS

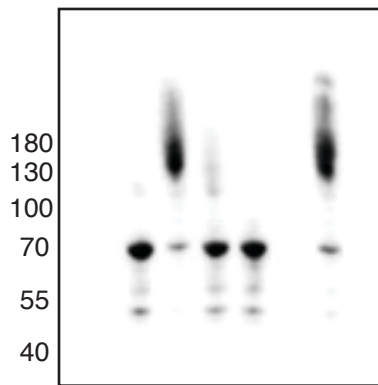

**h**

anti-cGAS

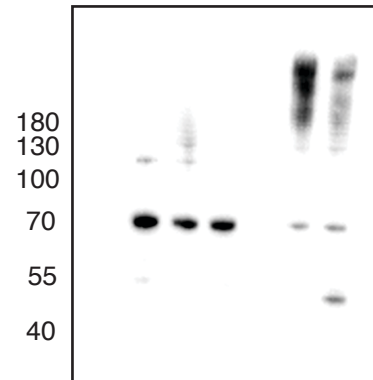

**i**

anti-Ubiquitin

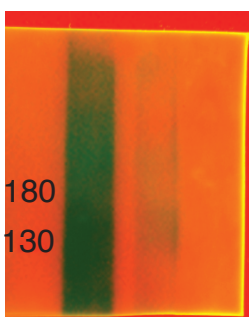

anti-SPSB3

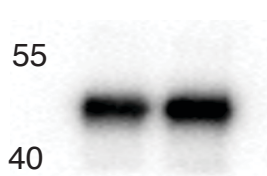

anti-cGAS

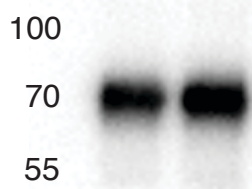

anti-SPSB3

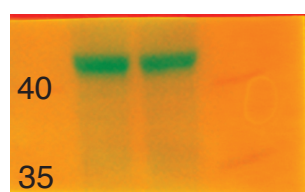

anti-cGAS

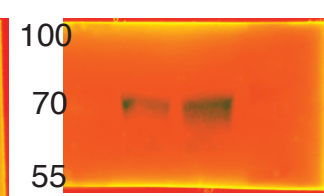

**Fig.4**

anti-cGAS

**b**

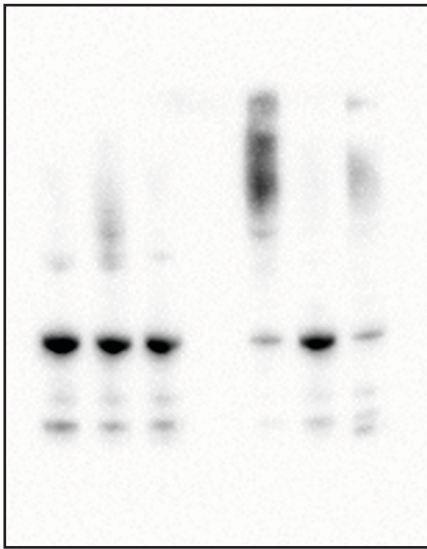

**c**

anti-Ubiquitin

anti-SPSB3

anti-cGAS

anti-SPSB3

anti-cGAS

180  
130  
100

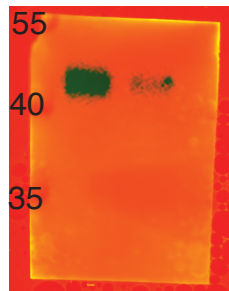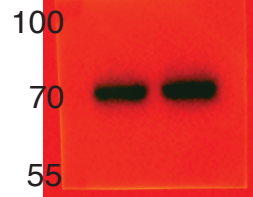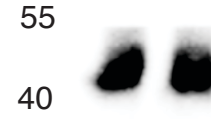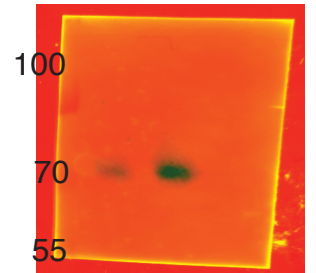

**d**

anti-cGAS

anti-ISG15

anti-GAPDH

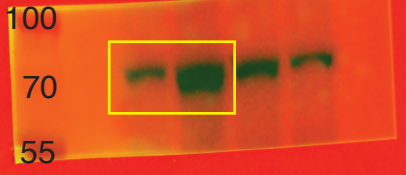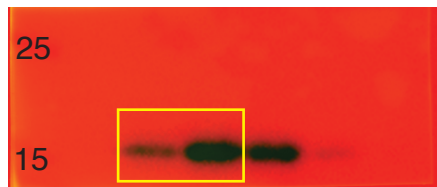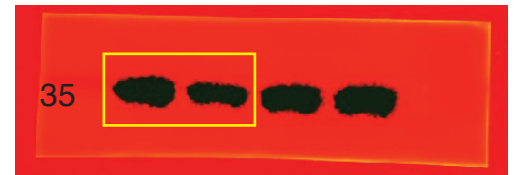



Extended Fig.2

f

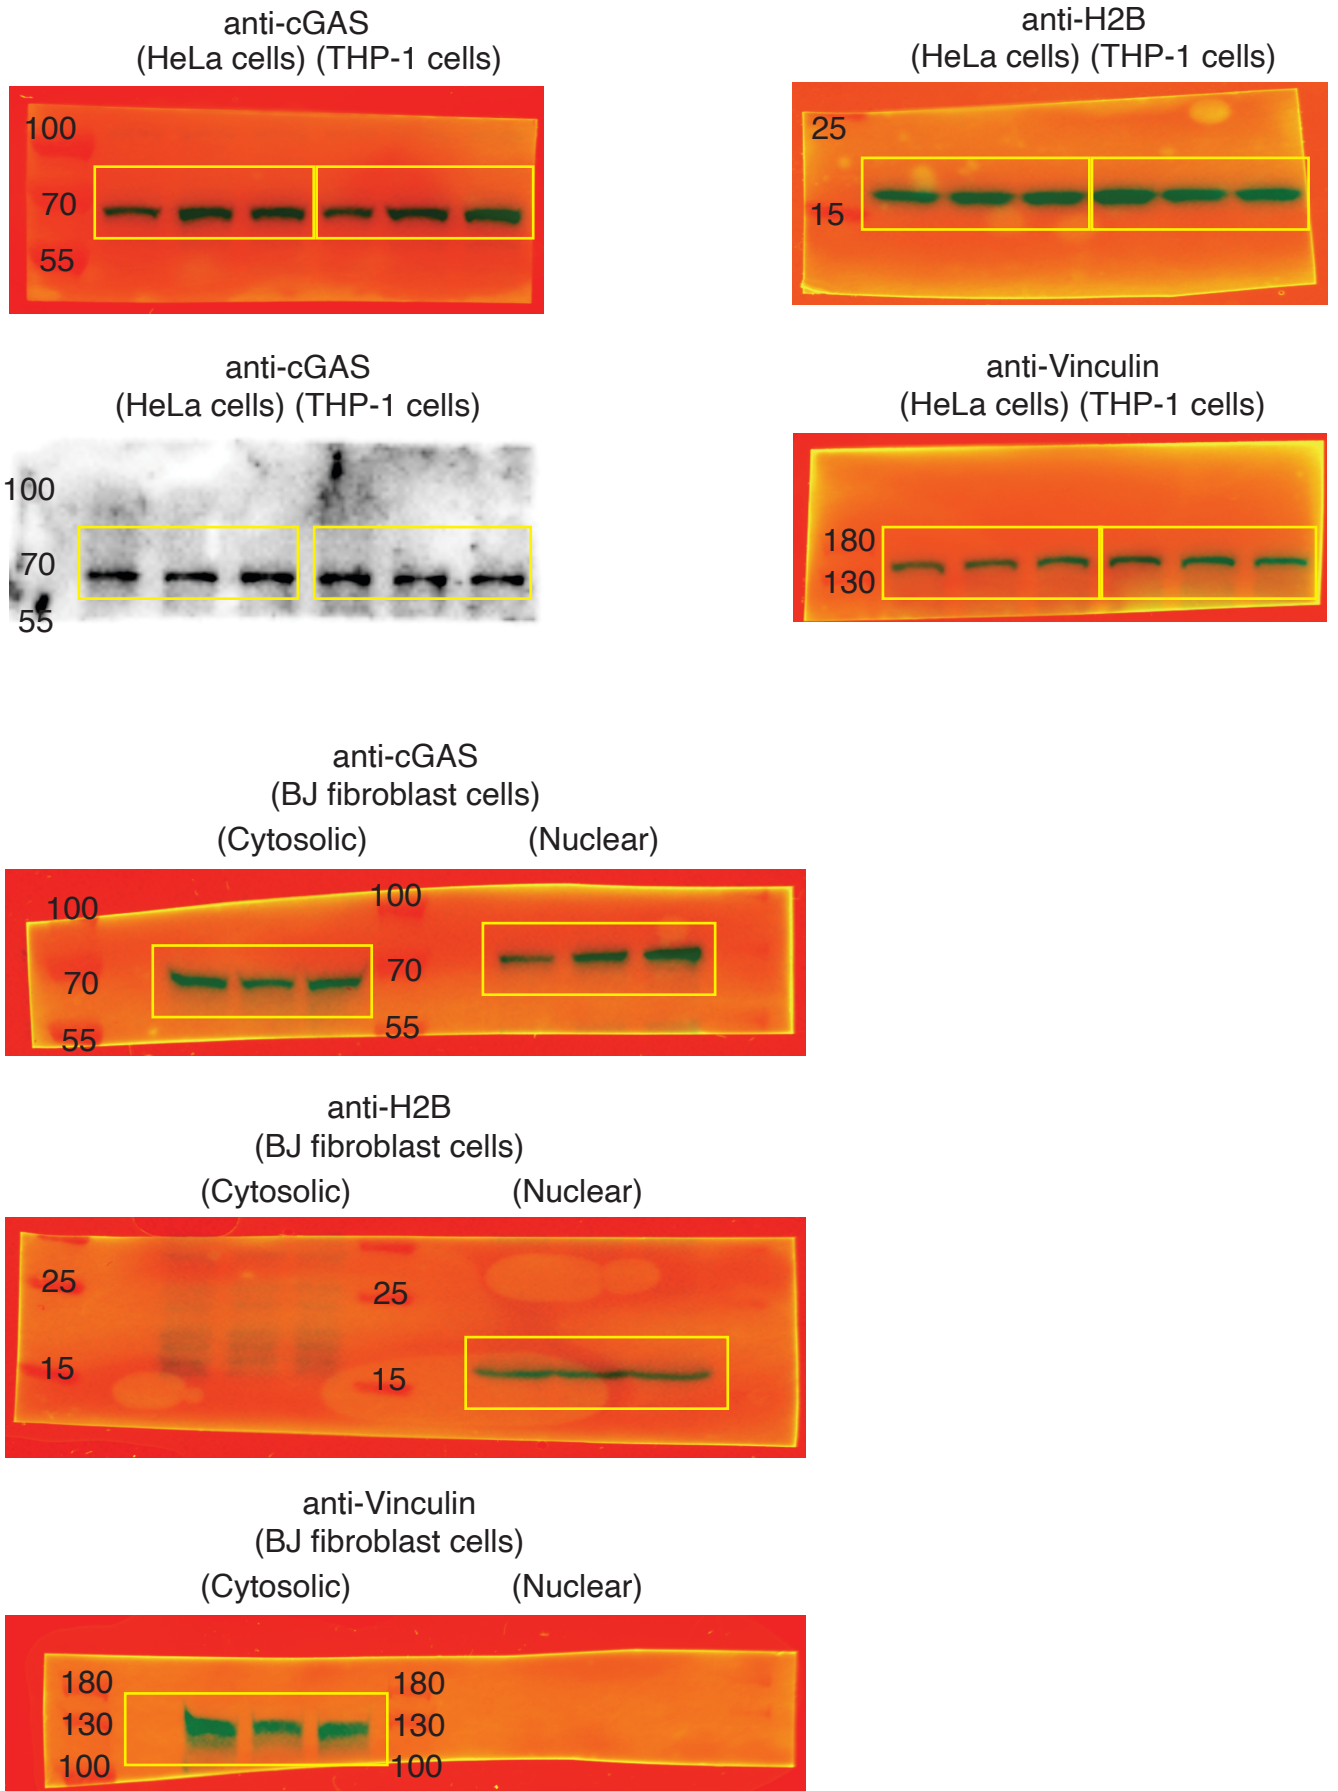

Extended Fig.3

e

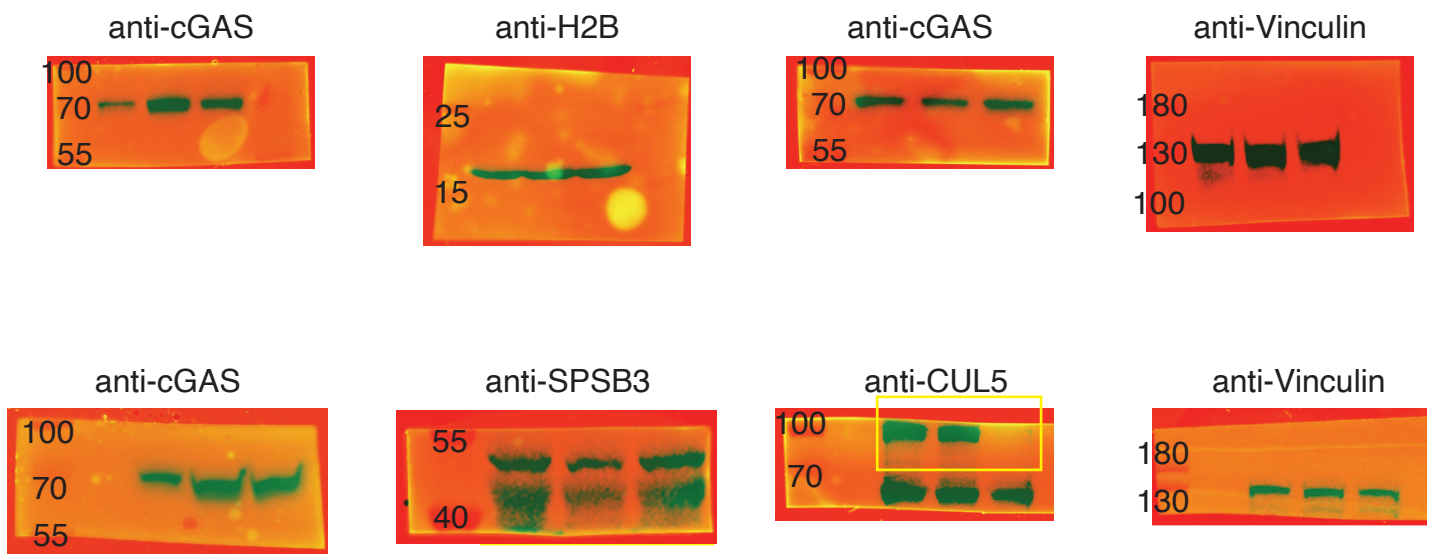

k

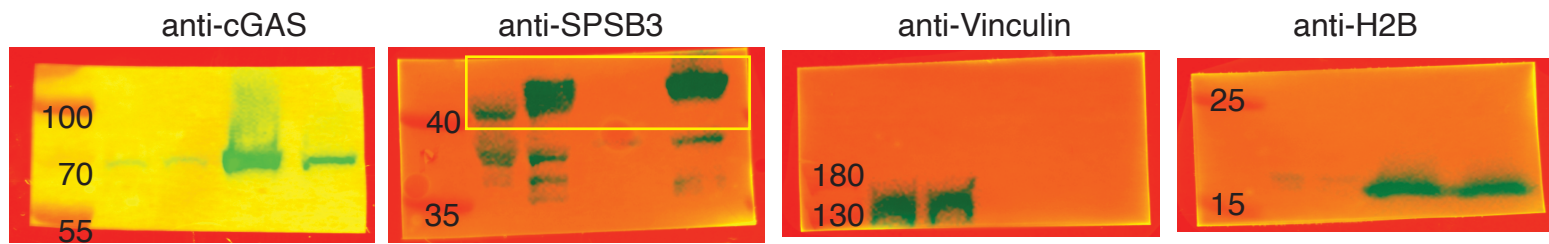

Extended Fig.3

i

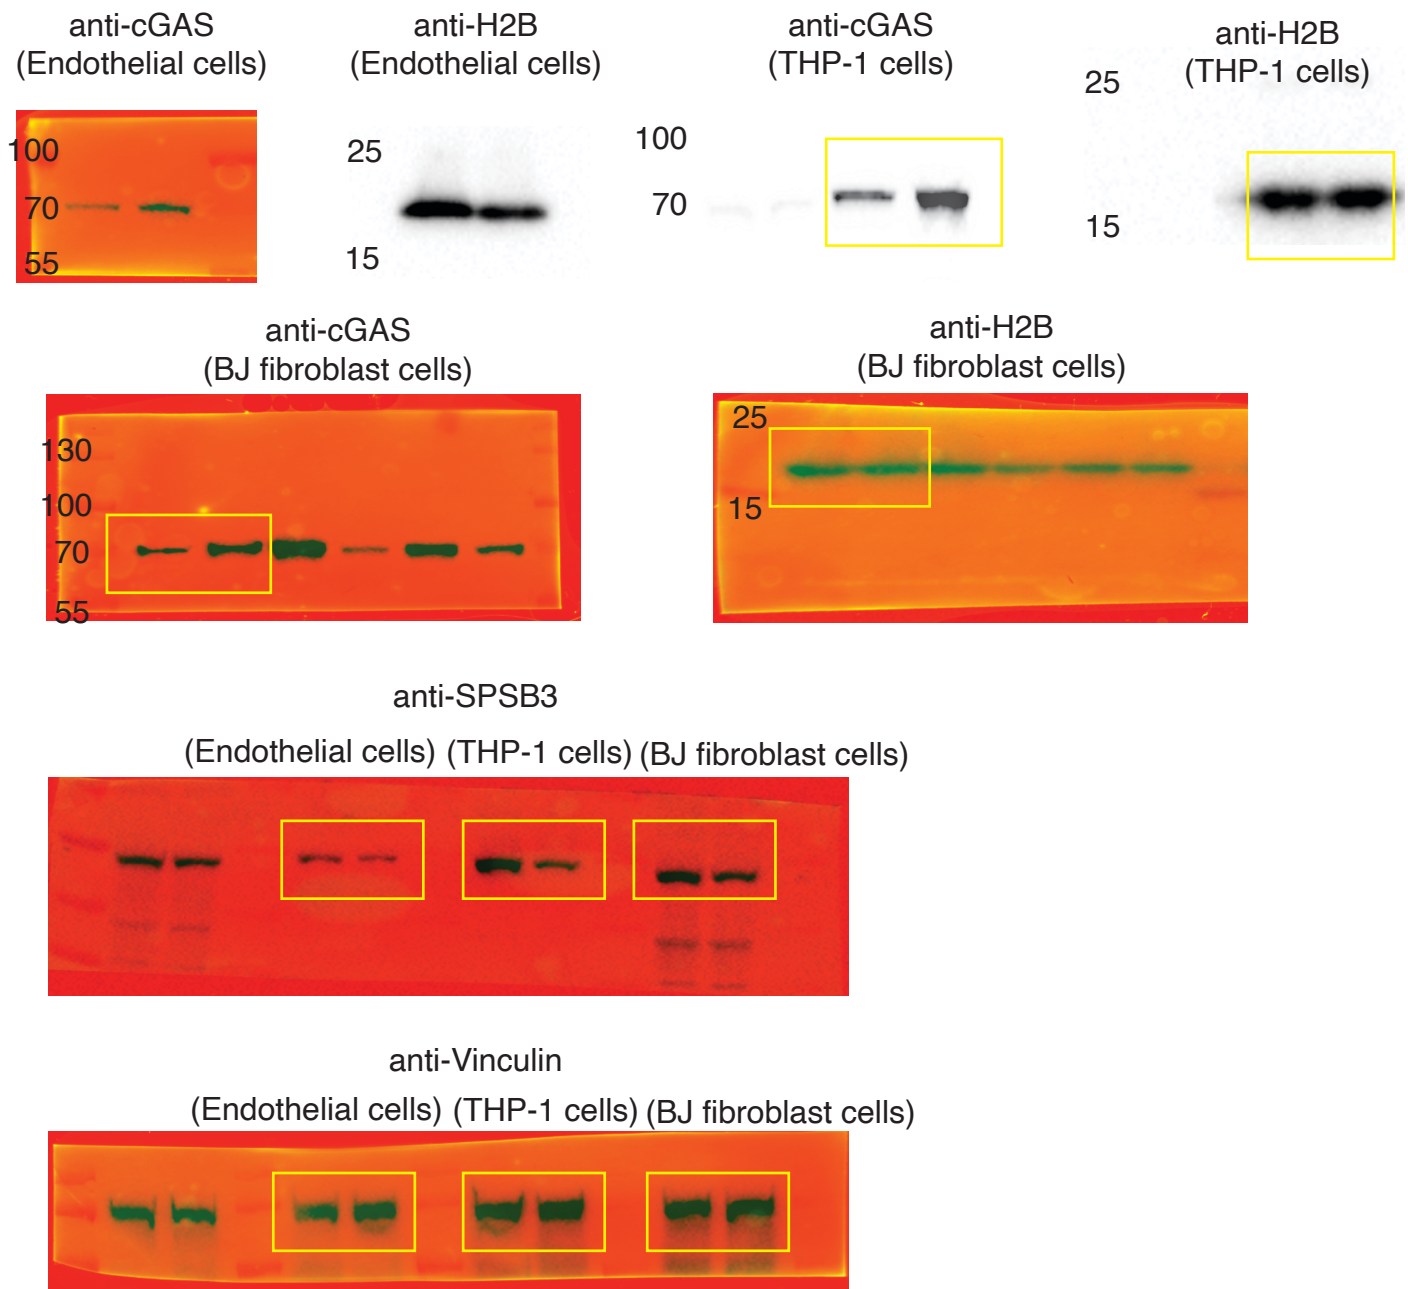

Extended Fig.4

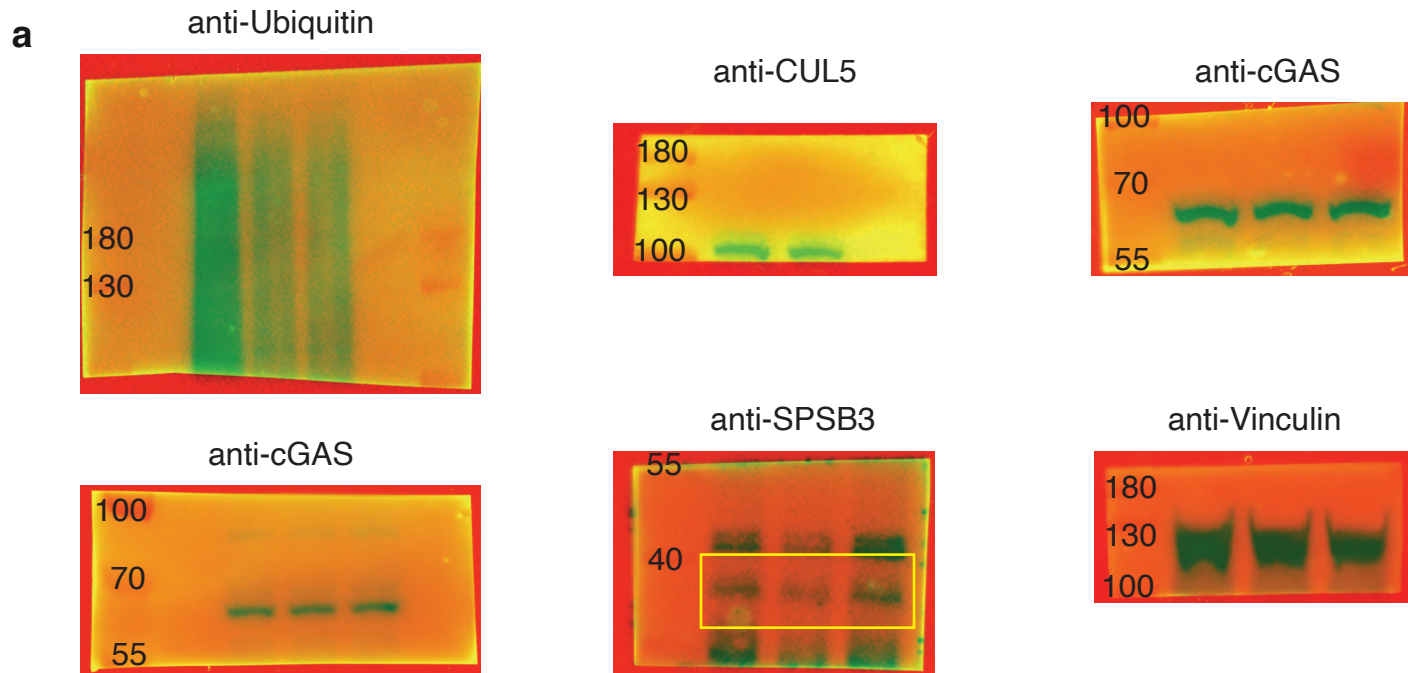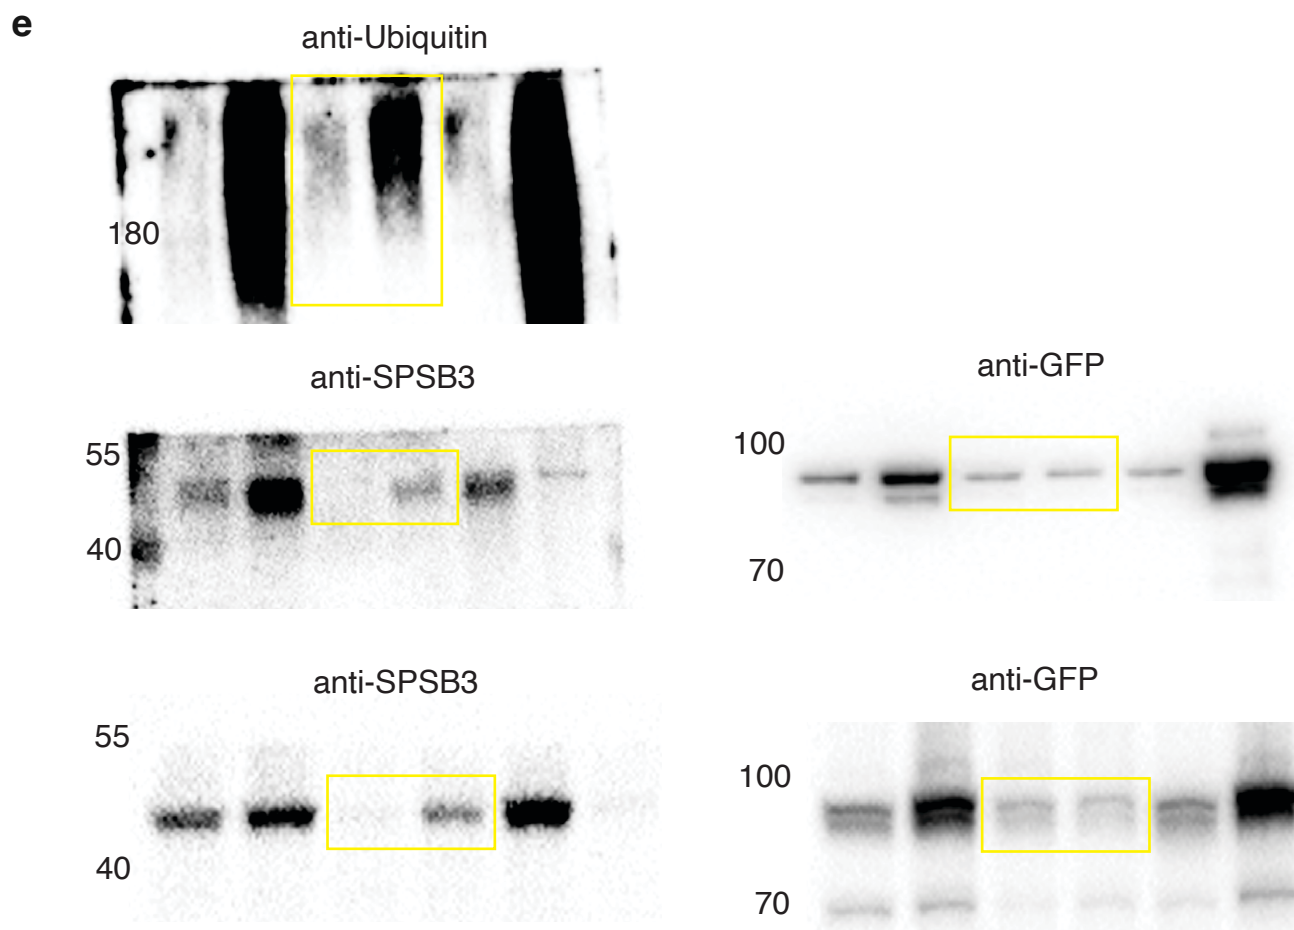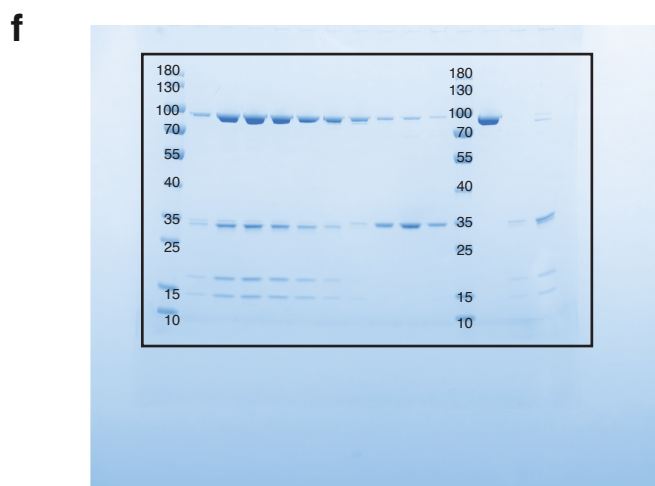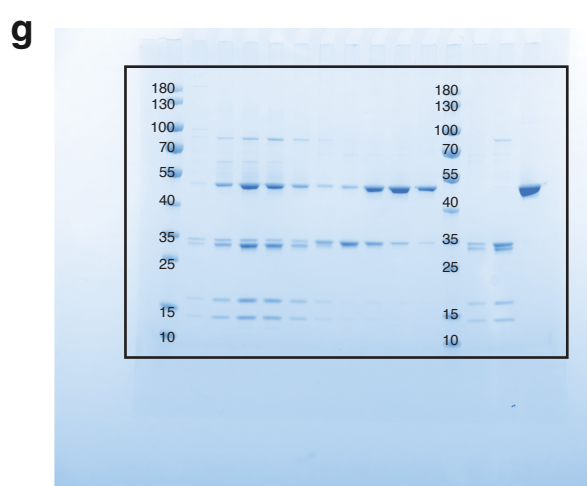



Extended Fig.5

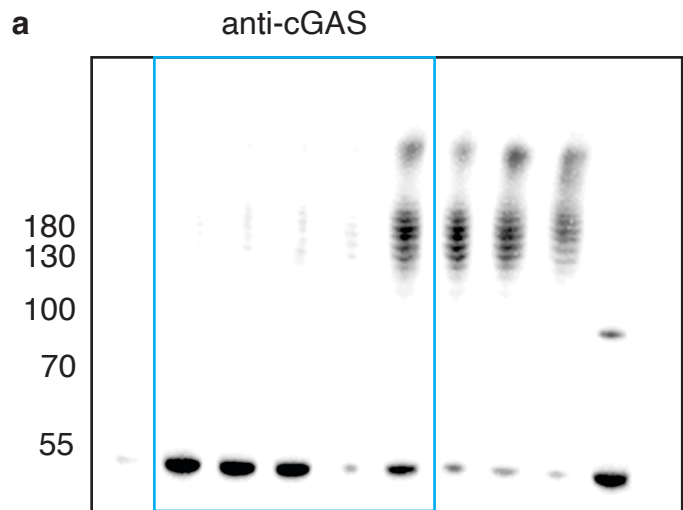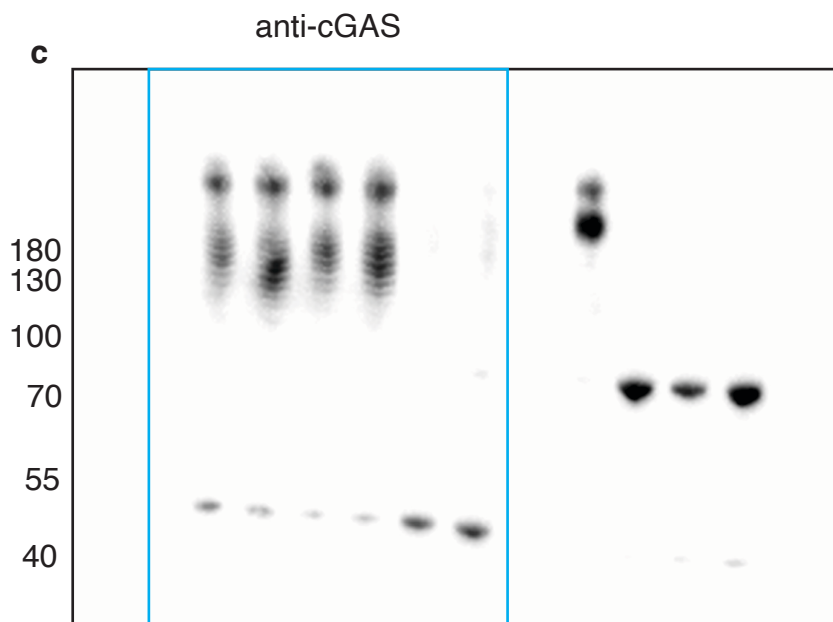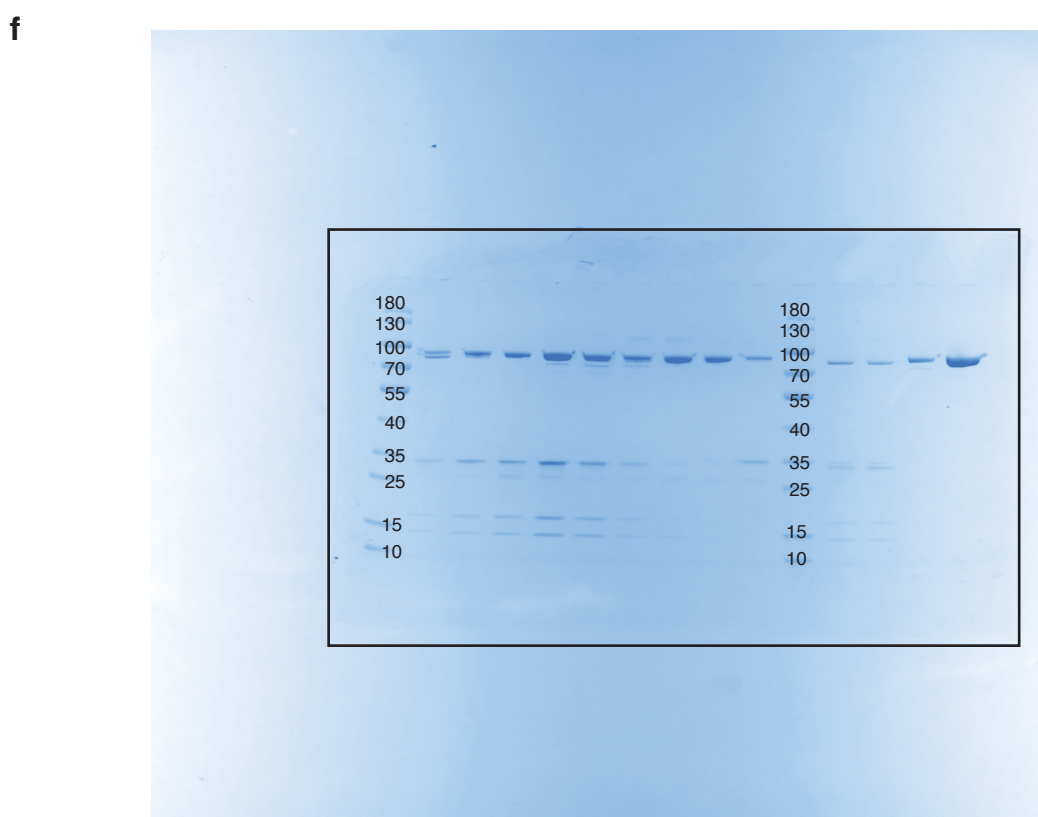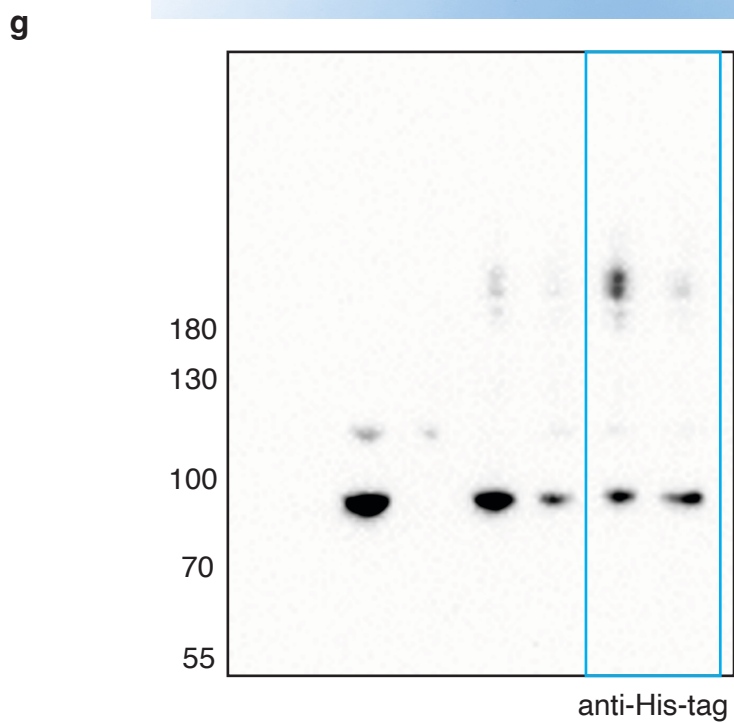

# Extended Fig.6

**a**

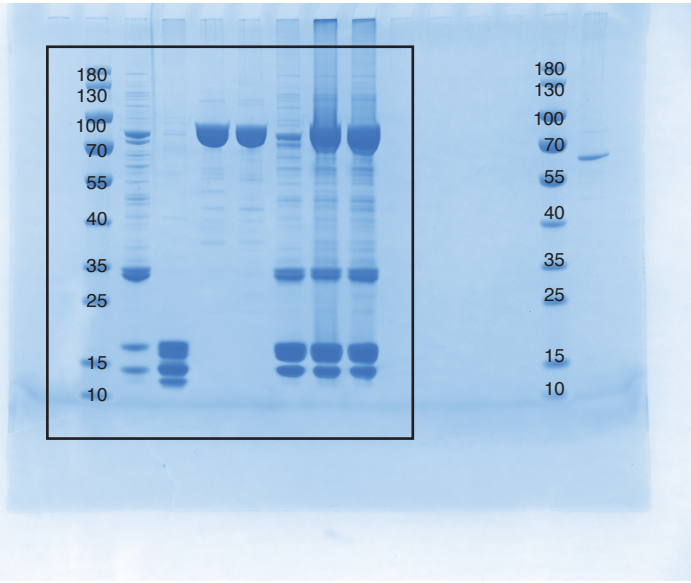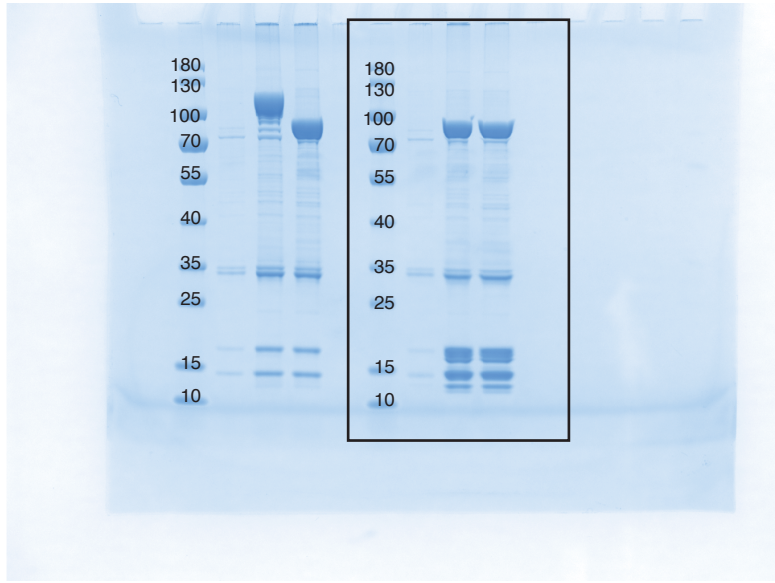

**c**

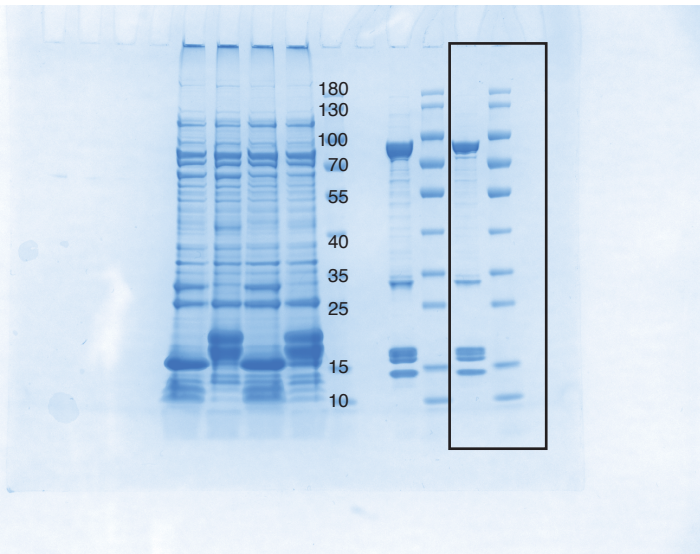



Extended Fig.9

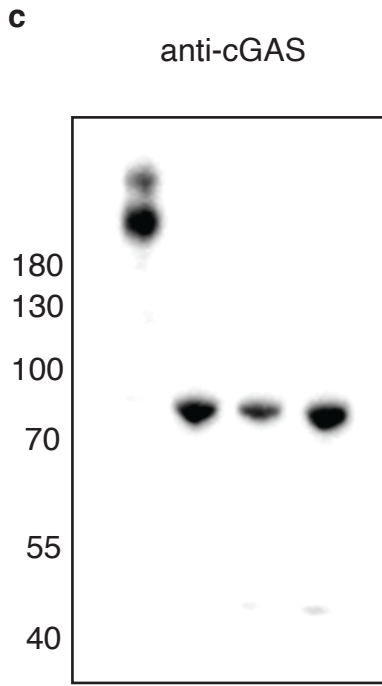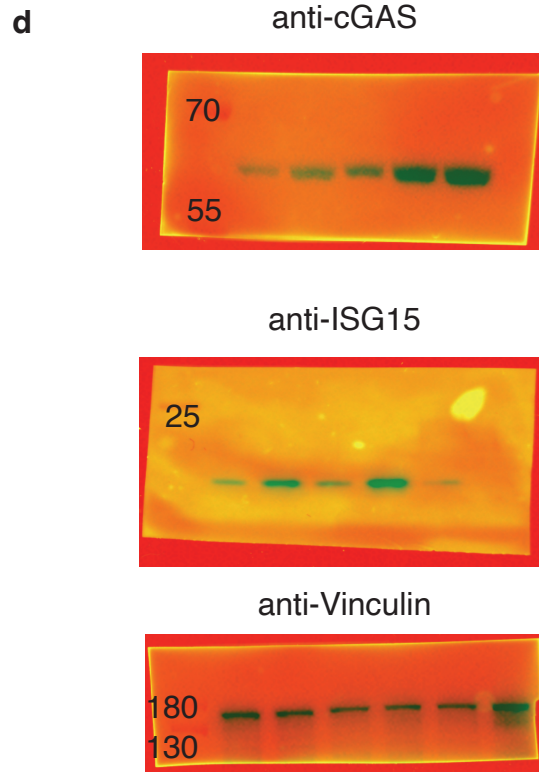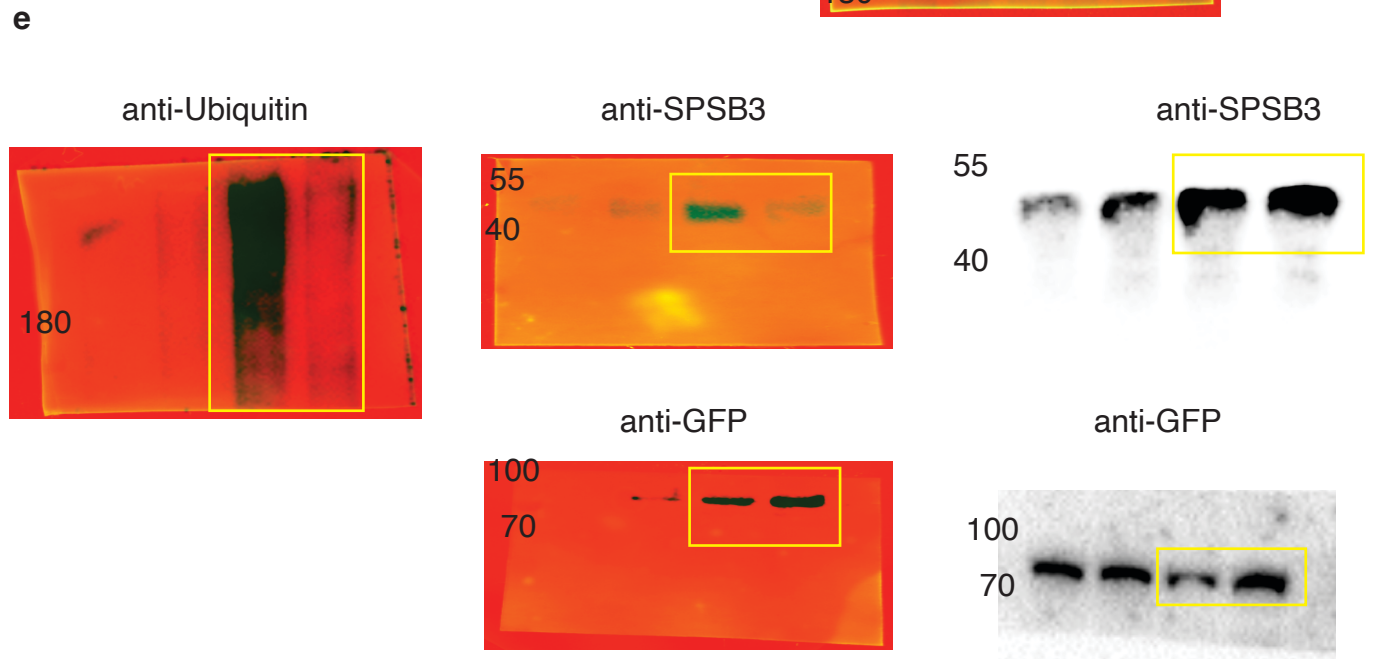

Extended Fig.10

c

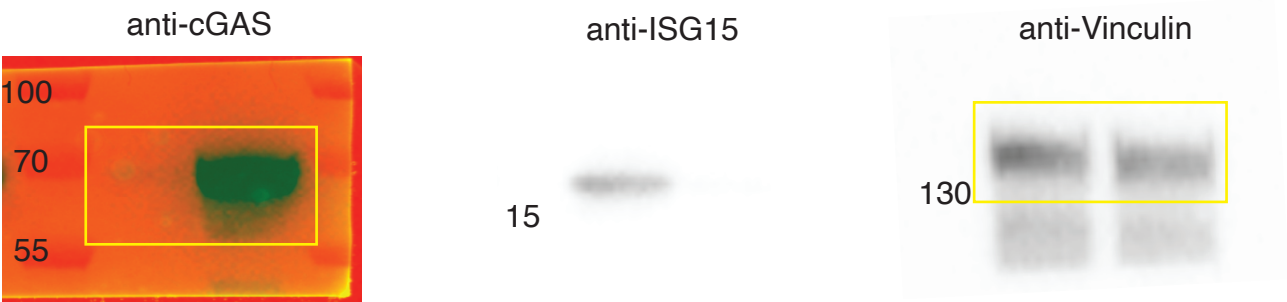

d

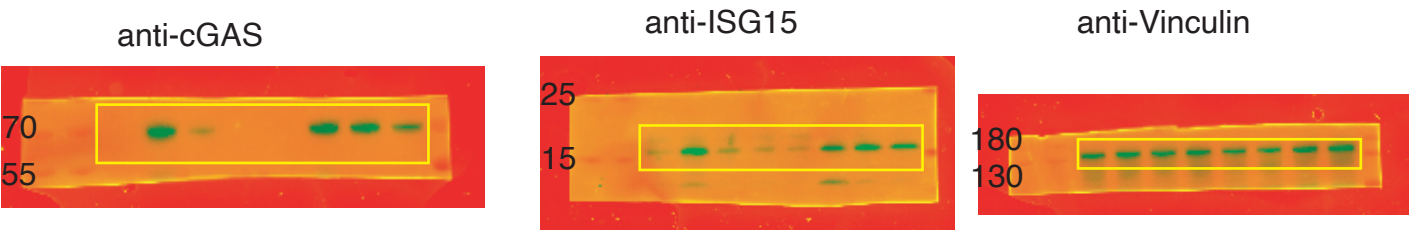

e

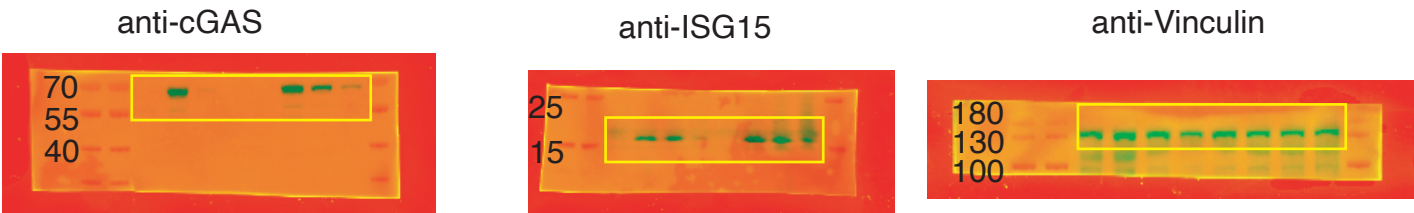

Infected HeLa cells gating strategy

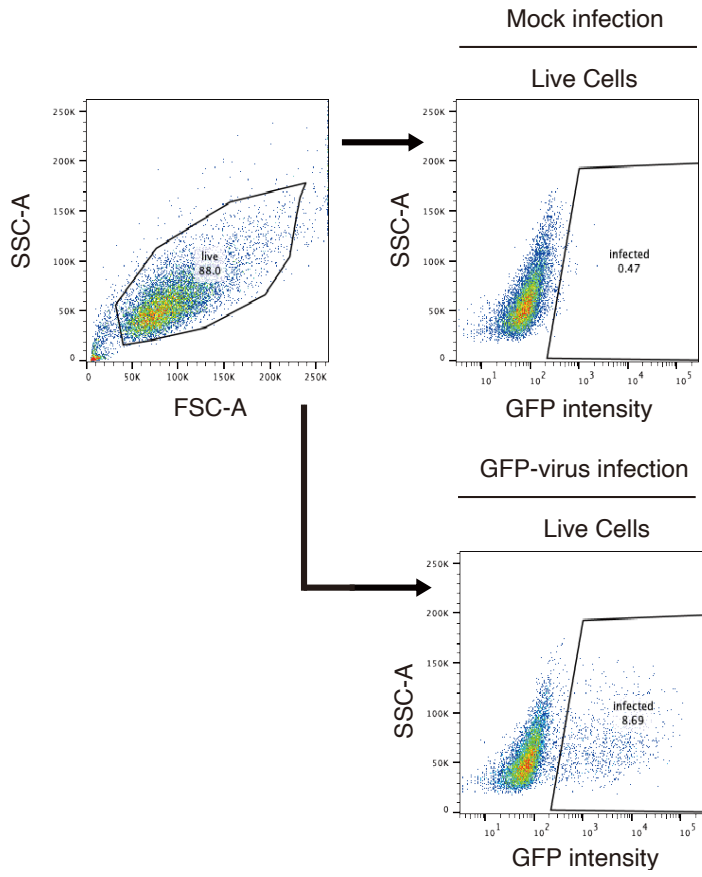

Supplementary Fig.2 | The flow cytometry gating strategy for quantification of GFP<sup>+</sup> cells, related to Figure 4i, 4j and Extended Data Figure 11k, is shown.
