# Supplementary material for: The CRL5–SPSB3 ubiquitin ligase targets nuclear cGAS for degradation
Source: PubMed Central journal article supplement (PMC10972748; doi:10.1038/s41586-024-07112-w), 2024-02-28
Supplement: 41586_2024_7112_MOESM4_ESM.pdf [file 41586_2024_7112_MOESM4_ESM.pdf]

Supplementary Table 1

| Gene symbol | Integrated intensity | SD Integrated intensity | Mean intensity replicate #1 | Mean intensity replicate #2 | Mean Intensity replicate #3 |
|-------------|----------------------|-------------------------|-----------------------------|-----------------------------|-----------------------------|
| ABI2        | -0.1353486           | 0.07333365              | 0.23634284                  | 0.17762523                  | 0.20060125                  |
| ACTB        | 0.29674608           | 0.14051126              | 0.60273157                  | 0.3147081                   | 0.46524515                  |
| ACTG1       | -0.1197244           | 0.03339002              | 0.28677521                  | 0.04369244                  | 0.09203009                  |
| ACVR1B      | -0.1232597           | 0.12778742              | 0.28371179                  | 0.06029295                  | 0.03813195                  |
| AGL         | 0.0770728            | 0.14425308              | 0.54466943                  | 0.11142112                  | 0.72913728                  |
| AICDA       | -0.1805802           | 0.37782721              | -0.0996562                  | 0.83751547                  | -0.1365064                  |
| AIRE        | 0.23092172           | 0.86250328              | 0.33265368                  | -0.358365                   | 2.73216143                  |
| AKT1        | 0.0350233            | 0.07566417              | 0.32037481                  | 0.1945998                   | 0.60334332                  |
| AKTIP       | -0.1011097           | 0.1766488               | -0.1494485                  | 0.48019359                  | 0.0919608                   |
| AMBRA1      | -0.1388043           | 0.16569565              | 0.06405397                  | 0.14060182                  | 0.33475497                  |
| AMFR        | 0.00329455           | 0.04884928              | 0.28584414                  | 0.14911603                  | 0.5592733                   |
| ANAPC1      | -0.0156833           | 0.21587624              | 0.23087584                  | 0.00590024                  | 0.38836506                  |
| ANAPC10     | 0.12201365           | 0.08754367              | 0.63000034                  | 0.32865129                  | 0.33965955                  |
| ANAPC11     | 0.05020331           | 0.22850155              | 0.51918836                  | 0.26710473                  | 0.42405987                  |
| ANAPC13     | 0.117685             | 0.3314263               | 0.98013707                  | 0.07364872                  | 0.50601401                  |
| ANAPC15     | 0.20071807           | 0.29552725              | 0.94392165                  | 0.15165175                  | 0.56519015                  |
| ANAPC16     | -0.1862446           | 0.07433164              | 0.04472513                  | -0.0206337                  | 0.47555631                  |
| ANAPC2      | 0.19509695           | 0.46752103              | 1.22361157                  | 0.18890516                  | 0.2797315                   |
| ANAPC4      | 0.12062941           | 0.35879221              | 0.55474929                  | 0.4034399                   | -0.1441268                  |
| ANAPC5      | 0.38692096           | 0.06151379              | 0.45189926                  | 0.53274255                  | 0.38791843                  |
| ANAPC7      | -0.2593761           | 0.34716102              | 0.26291945                  | -0.3097664                  | 0.47073115                  |
| ANKIB1      | -0.0637646           | 0.22541613              | -0.0220923                  | 0.53685741                  | 0.23174237                  |
| APC2        | -0.1072772           | 0.24612619              | 0.41004813                  | 0.07421082                  | 0.12839133                  |
| AREL1       | 0.00032171           | 0.14865209              | 0.16262813                  | 0.18212994                  | 0.60355225                  |
| ARIH1       | -0.1132477           | 0.07006814              | 0.11278617                  | 0.17874434                  | 0.28317403                  |
| ARIH2       | -0.0172727           | 0.25142473              | 0.05422913                  | 0.66301079                  | 0.47217216                  |
| ARRB1       | 0.02723005           | 0.26751293              | 0.18336942                  | -0.0297878                  | 0.75564693                  |
| ARRB2       | 0.01525062           | 0.03558122              | 0.42962601                  | 0.29538221                  | 0.18867091                  |
| ARRDC3      | -0.261985            | 0.01989072              | 0.10238868                  | -0.230759                   | 0.05138907                  |
| ARRDC4      | 0.15838309           | 0.5716852               | -0.0312118                  | -0.0430398                  | 0.37089891                  |
| ASB1        | -0.3700937           | 0.05439684              | 0.05401291                  | -0.3177554                  | -0.0785426                  |
| ASB10       | -0.1193979           | 0.20148452              | 0.04243394                  | 0.2038722                   | -0.2227137                  |
| ASB11       | 0.06270773           | 0.24282235              | 0.46383124                  | 0.01738498                  | 0.73929191                  |
| ASB12       | 0.00788568           | 0.1605601               | -0.1346616                  | 0.16461126                  | 0.72342727                  |
| ASB13       | -0.266561            | 0.17310439              | -0.4128828                  | -0.0519155                  | 0.51870575                  |
| ASB14       | -0.1825089           | 0.17158816              | 0.08669989                  | -0.0181709                  | 0.22902414                  |
| ASB15       | -0.116603            | 0.09767408              | -0.0533528                  | 0.2702801                   | 0.52726177                  |
| ASB16       | 0.213063             | 0.59164954              | 1.08287029                  | 0.14700637                  | 0.07715946                  |
| ASB17       | -0.294264            | 0.20391949              | -0.2665768                  | -0.2437867                  | 0.5670913                   |
| ASB18       | -0.1508423           | 0.19720887              | -0.030658                   | -0.0325208                  | 0.3773499                   |
| ASB2        | -0.1228122           | 0.15316065              | 0.17236198                  | 0.71425893                  | 0.08396564                  |
| ASB3        | -0.1906241           | 0.15720359              | 0.22291796                  | 0.00937434                  | 0.25143243                  |
| ASB4        | -0.2859605           | 0.19972499              | 0.41093715                  | -0.1049189                  | 0.06686876                  |
| ASB5        | -0.0774331           | 0.28285706              | 0.51843944                  | 0.02437047                  | 0.33629034                  |
| ASB6        | -0.0848903           | 0.09705854              | -0.0202191                  | 0.05221727                  | 0.64742321                  |
| ASB7        | -0.1308836           | 0.11604185              | -0.0608425                  | 0.22617214                  | 0.51679776                  |
| ASB8        | -0.0860142           | 0.03991779              | 0.0643334                   | 0.14102977                  | 0.52916623                  |
| ASB9        | -0.1619383           | 0.0972599               | -0.0390909                  | 0.21675694                  | 0.31996073                  |
| ATG3        | 0.18332458           | 0.31102194              | -0.038254                   | 1.10613271                  | 0.86334757                  |
| ATG7        | -0.0899735           | 0.34381096              | 0.28657745                  | -0.0517254                  | 0.29572756                  |
| ATP6V0C     | -0.28635             | 0.19096462              | 0.32914923                  | -0.0702884                  | -0.2829134                  |
| ATRIP       | 0.08299124           | 0.46569842              | 0.24384605                  | 1.29353377                  | 0.051371                    |
| ATRX        | -0.0059926           | 0.13205782              | 0.15872766                  | 0.3857884                   | 0.83484526                  |
| AURKA       | 0.31317606           | 0.43294643              | 0.47761129                  | 0.48905317                  | 0.05159224                  |
| AXIN1       | -0.3168267           | 0.21412866              | -0.4310407                  | 0.02624318                  | 0.22680533                  |
| AXIN2       | -0.2947809           | 0.21808011              | -0.3345336                  | 0.06273381                  | 0.18016929                  |
| B2M         | -0.1284159           | 0.2656376               | 0.83208756                  | -0.3770481                  | 0.20683061                  |
| BAG5        | -0.2851631           | 0.05270052              | -0.0627857                  | -0.1411149                  | 0.26570468                  |
| BARD1       | 0.18116244           | 0.39004869              | 0.31739539                  | -0.0486656                  | 0.76549038                  |
| BAT3        | -0.1135619           | 0.14325775              | -0.0343225                  | 0.22562311                  | 0.2607026                   |
| BCL10       | -0.2342269           | 0.01096327              | 0.09914265                  | -0.0088993                  | 0.20183604                  |
| BCL2        | 0.054124             | 0.05639969              | 0.40941977                  | 0.37657093                  | 0.49565186                  |
| BCOR        | 0.08567507           | 0.2909113               | 0.45287371                  | 1.27413347                  | 0.38235688                  |
| BFAR        | -0.1207576           | 0.44467314              | 0.41720457                  | -0.113995                   | 0.28118916                  |
| BID         | -0.1456558           | 0.15923699              | 0.48330304                  | -0.0901983                  | 0.14815267                  |
| BIRC2       | -0.2107876           | 0.43499383              | -0.0415874                  | 0.69042532                  | -0.2274451                  |
| BIRC3       | -0.1061303           | 0.16445425              | 0.04149309                  | 0.33809528                  | 0.2675067                   |
| BIRC5       | 0.58323903           | 0.71917924              | 0.1522718                   | 0.13386894                  | 1.00369581                  |
| BIRC6       | 0.12063765           | 0.19359724              | 0.22903296                  | 0.75159947                  | 0.61719592                  |
| BIRC7       | -0.1430645           | 0.22128803              | 0.20751281                  | -0.0055992                  | 0.12458321                  |
| BIRC8       | -0.0767404           | 0.22979637              | -0.1699498                  | 0.05605367                  | 0.66618085                  |
| BLMH        | -0.3219891           | 0.21456626              | -0.2192349                  | -0.3612644                  | 0.52957007                  |
| BLZF1       | -0.1717851           | 0.1829923               | 0.49508249                  | 0.07010653                  | 0.19915593                  |
| BMI1        | 0.07205649           | 0.40917669              | 0.29020545                  | 0.08272429                  | 0.7617163                   |
| BRAP        | -0.4619829           | 0.29272415              | -0.4707083                  | 0.11066263                  | -0.6461106                  |
| BRCA1       | 0.05235492           | 0.43758422              | 0.7907664                   | -0.2005844                  | 0.523736                    |
| BRCA2       | -0.011139            | 0.0938762               | 0.41348706                  | 0.24463102                  | 0.28449738                  |
| BRE         | -0.1556519           | 0.07919454              | 0.06607354                  | 0.08600996                  | 0.2930063                   |
| BTBD1       | -0.0312019           | 0.1428037               | 0.42842104                  | 0.36980028                  | 0.48882541                  |
| BTBD2       | -0.0422735           | 0.29188405              | 0.00428596                  | 0.32501139                  | 0.07506967                  |

| Gene symbol | Integrated intensity | SD Integrated intensity | Mean intensity replicate #1 | Mean intensity replicate #2 | Mean Intensity replicate #3 |
|-------------|----------------------|-------------------------|-----------------------------|-----------------------------|-----------------------------|
| BTRC        | -0.1435981           | 0.20577451              | -0.119872                   | 0.11497097                  | 0.63546572                  |
| BUB1B       | -0.0294401           | 0.13674152              | 0.233451                    | 0.40348998                  | 0.3933606                   |
| BUB3        | -0.2893069           | 0.08261323              | -0.238504                   | -0.3026922                  | 0.25091034                  |
| C12orf51    | -0.1860801           | 0.18105332              | 0.07448243                  | 0.00134367                  | 0.31560795                  |
| C14orf100   | -0.287276            | 0.23133483              | 0.41439663                  | -0.3044385                  | -0.1093691                  |
| C1orf124    | -0.0391985           | 0.42645456              | -0.1874205                  | 1.03212594                  | 0.10414313                  |
| C1orf86     | -0.039534            | 0.28051138              | 0.35067159                  | 0.03673535                  | 0.41408385                  |
| C2orf37     | -0.3301209           | 0.35838756              | 0.13650561                  | -0.6234317                  | 0.08395738                  |
| C6orf106    | -0.201829            | 0.19181118              | -0.044921                   | -0.1238406                  | 0.4509735                   |
| CACUL1      | -0.0364276           | 0.33810578              | 0.58937856                  | -0.0862622                  | 0.42131462                  |
| CALR        | -0.006117            | 0.0910995               | 0.57401412                  | 0.07415572                  | 0.44195932                  |
| CAND1       | 0.27840217           | 0.21023347              | 0.33763642                  | 0.84555913                  | 0.47535558                  |
| CAND2       | -0.182705            | 0.20641395              | -0.2669765                  | 0.1350956                   | 0.3876793                   |
| CASC3       | -0.0254657           | 0.11744539              | 0.14463053                  | 0.05683881                  | 0.32312006                  |
| CASP10      | 0.18305266           | 0.22591576              | 0.20154412                  | 0.71046088                  | 0.38520091                  |
| CASP8       | 0.22311338           | 0.74617188              | 1.95853241                  | -0.1508282                  | 0.6076171                   |
| CBFB        | 0.03051709           | 0.24866045              | 0.5737579                   | 0.03282079                  | 0.73355901                  |
| CBL         | -0.0518984           | 0.09113573              | 0.32947266                  | 0.15784425                  | 0.38541939                  |
| CBLB        | -0.0622785           | 0.17498236              | 0.3735436                   | 0.14368484                  | 0.95035568                  |
| CBLC        | -0.2348601           | 0.0950654               | -0.2452328                  | -0.0584964                  | 0.01486559                  |
| CBLL1       | -0.6297274           | 0.12292699              | -0.2708084                  | -0.422638                   | -0.5147548                  |
| CBS         | -0.2343863           | 0.11279995              | 0.18559978                  | -0.1068452                  | 0.19794331                  |
| CBX8        | -0.3294115           | 0.23247617              | 0.11819408                  | -0.1914639                  | 0.09756316                  |
| CCDC22      | -0.0139027           | 0.16911939              | 0.46586845                  | 0.20502776                  | 0.30014452                  |
| CCDC23      | -0.1483941           | 0.34482373              | 0.47421992                  | -0.1741789                  | -0.0867157                  |
| CCDC50      | -0.0674549           | 0.13972432              | 0.2503563                   | 0.28677629                  | 0.12865447                  |
| CCNB1       | 0.07940546           | 0.06516012              | 0.44236272                  | 0.10365698                  | 0.14836235                  |
| CCNB1IP1    | -0.1746499           | 0.15627601              | 0.09989566                  | 0.30741743                  | 0.03121531                  |
| CCNC        | -0.5611243           | 0.1113204               | -0.2063106                  | -0.6285113                  | -0.7168044                  |
| CCNF        | 0.04368757           | 0.48068849              | -0.0008557                  | 0.21457562                  | 1.27912763                  |
| CCT2        | 0.17208121           | 0.30040513              | 0.62406506                  | 0.17592949                  | 1.00020107                  |
| CD40        | -0.235882            | 0.25818759              | 0.51394563                  | -0.365231                   | 0.28703655                  |
| CDC14B      | -0.1946394           | 0.11995256              | 0.13637214                  | 0.14959838                  | 0.08147948                  |
| CDC16       | 0.24930062           | 0.40662122              | 0.14349493                  | 0.29757338                  | 0.82760156                  |
| CDC2        | 0.50764657           | 0.29662855              | 0.37088902                  | 0.3761167                   | 1.30860723                  |
| CDC20       | 0.48836513           | 0.85007173              | 0.52969536                  | 0.31344944                  | 2.36287855                  |
| CDC23       | -0.0970553           | 0.12332192              | 0.21913801                  | -0.0056065                  | 0.26330517                  |
| CDC26       | 0.08557256           | 0.20078384              | 0.36830448                  | 0.23379834                  | 0.542149                    |
| CDC27       | 0.20005105           | 0.58806068              | 0.98689101                  | 0.03902345                  | 0.39101021                  |
| CDC34       | -0.0837581           | 0.15944358              | 0.52731799                  | -0.0382966                  | -0.2667794                  |
| CDC73       | -0.1582065           | 0.23950565              | 0.27720395                  | -0.1457898                  | 0.50168428                  |
| CDCA3       | 0.07069107           | 0.15540712              | 0.44541329                  | 0.95942412                  | 0.36035336                  |
| CDH1        | -0.1418764           | 0.15399176              | 0.30327119                  | -0.0121202                  | 0.73406132                  |
| CDK2        | -0.0487597           | 0.28248406              | 0.33056754                  | 0.54490486                  | -0.091778                   |
| CDK5RAP3    | -0.1422168           | 0.10634684              | 0.20671897                  | 0.34931584                  | 0.41470215                  |
| CDK8        | -0.5964314           | 0.22558529              | -0.606791                   | -0.3084378                  | -0.9423975                  |
| CDKN1A      | -0.2387217           | 0.14020755              | 0.27757795                  | -0.2174136                  | 0.05811868                  |
| CDKN1B      | -0.0495433           | 0.24517611              | 0.34712792                  | -0.1258538                  | 0.87604384                  |
| CDKN2A      | -0.2739686           | 0.11471467              | 0.05737582                  | -0.3102259                  | 0.03316785                  |
| CGRRF1      | -0.1746627           | 0.31959817              | 0.2652972                   | -0.1372322                  | 0.0488786                   |
| CHD5        | -0.1512525           | 0.06693284              | 0.1498714                   | 0.18165861                  | 0.27655561                  |
| CHEK2       | -0.0183851           | 0.07379531              | 0.13755582                  | 0.20025499                  | 0.52740984                  |
| CHFR        | 0.03115225           | 0.27653197              | 0.02488317                  | 0.59638876                  | -0.0353634                  |
| CISH        | -0.1063216           | 0.13928095              | 0.3203328                   | 0.00166638                  | 0.25272441                  |
| CLU         | -0.1397878           | 0.10125799              | 0.3510986                   | 0.00651871                  | 0.17647642                  |
| CNOT4       | -0.1585              | 0.159104                | 0.061851                    | 0.099402                    | 0.15986                     |
| COMMD1      | -0.0579851           | 0.29289389              | 0.26220769                  | -0.1305157                  | 0.94334478                  |
| CRBN        | -0.2723543           | 0.20665622              | 0.06636338                  | -0.2710973                  | 0.32283046                  |
| CRY1        | -0.1908756           | 0.22911017              | 0.32849119                  | 0.11109461                  | -0.0794516                  |
| CRY2        | 0.12705197           | 0.28506819              | 0.11946186                  | 0.21728658                  | 0.87652273                  |
| CTR9        | -0.3072299           | 0.062922                | -0.0729143                  | 0.01670689                  | -0.081653                   |
| CUL1        | 0.24448734           | 0.57468906              | -0.2676737                  | 0.39204467                  | 1.07845249                  |
| CUL2        | -0.1788935           | 0.10225681              | -0.169028                   | 0.11815303                  | 0.33727989                  |
| CUL3        | -0.0446773           | 0.09036462              | 0.02312586                  | 0.22611985                  | -0.0179897                  |
| CUL4A       | -0.0611429           | 0.057015                | 0.15198223                  | 0.256022                    | 0.45988981                  |
| CUL4B       | -0.2482546           | 0.10664865              | 0.01241522                  | 0.10338297                  | -0.0746762                  |
| CUL5        | 0.77244603           | 0.58720867              | 0.95509239                  | 0.66774739                  | 1.50967652                  |
| CUL7        | -0.1357378           | 0.18036896              | 0.04630264                  | -0.2309489                  | 0.37377752                  |
| CUL9        | -0.0074002           | 0.09935418              | 0.38392451                  | 0.08797743                  | 0.58908769                  |
| CXCR4       | -0.0765054           | 0.08554586              | -0.0106763                  | 0.0657938                   | 0.43511523                  |
| DAXX        | -0.2374717           | 0.19684726              | 0.16293916                  | 0.06220772                  | 0.01657555                  |
| DCAF10      | 0.10125966           | 0.43972957              | 0.07859026                  | 0.0965922                   | 1.59086679                  |
| DCAF15      | -0.1604958           | 0.14318592              | -0.2223378                  | 0.17473477                  | 0.34840021                  |
| DCAF16      | -0.340878            | 0.22480049              | 0.25736851                  | -0.3697637                  | 0.04079689                  |
| DCAF6       | -0.158977            | 0.22447977              | 0.16564324                  | 0.23867077                  | -0.0620793                  |
| DCAF7       | -0.234312            | 0.29148326              | 0.08349038                  | 0.30043564                  | -0.2103779                  |
| DCST1       | -0.1184679           | 0.40037445              | 0.41532047                  | -0.1177678                  | 0.11965234                  |
| DCUN1D1     | 0.09123432           | 0.03210878              | 0.3029669                   | 0.38568306                  | 0.61059528                  |
| DDA1        | -0.0189803           | 0.14350474              | 0.38633892                  | 0.21442043                  | 0.21507674                  |
| DDB1        | 0.56908406           | 0.4330935               | 0.47022751                  | 0.26862178                  | 0.99917666                  |
| DDB2        | -0.1901679           | 0.10893998              | 0.23554415                  | -0.1349796                  | 0.49988835                  |
| DERL1       | -0.3755558           | 0.0757653               | -0.2454175                  | -0.1162562                  | 0.10887054                  |

| Gene symbol | Integrated intensity | SD Integrated intensity | Mean intensity replicate #1 | Mean intensity replicate #2 | Mean Intensity replicate #3 |
|-------------|----------------------|-------------------------|-----------------------------|-----------------------------|-----------------------------|
| DET1        | -0.1665632           | 0.07639588              | 0.13818186                  | 0.05897805                  | 0.29028179                  |
| DIABLO      | -0.0506855           | 0.22382772              | 0.47265447                  | 0.47870617                  | 0.20385309                  |
| DIO2        | -0.0279756           | 0.15857472              | 0.1718298                   | 0.04493977                  | 0.02637479                  |
| DLG3        | -0.2889941           | 0.19810017              | -0.2506588                  | 0.04927916                  | 0.32545838                  |
| DNAJA1      | -0.1013304           | 0.07132087              | 0.35630137                  | 0.03874329                  | 0.28596352                  |
| DNAJA3      | -0.0126974           | 0.17166172              | 0.22270976                  | 0.15740471                  | 0.75144541                  |
| DNAJC2      | -0.2155923           | 0.28545988              | 0.06400731                  | 0.00129973                  | -0.3864058                  |
| DNM1L       | -0.1593227           | 0.14487662              | 0.31422949                  | 0.19083258                  | 0.2068829                   |
| DPF1        | -0.0937877           | 0.17858005              | 0.03612887                  | -0.0638882                  | 0.12492131                  |
| DPF2        | -0.2111414           | 0.21051853              | 0.12718149                  | -0.42838                    | 0.46717017                  |
| DTL         | -0.0546053           | 0.26059507              | -0.1836533                  | 0.00647677                  | -0.1726954                  |
| DTX1        | 0.02855405           | 0.27341367              | 0.4588643                   | -0.1165611                  | 0.27541735                  |
| DTX2        | -0.1834671           | 0.24090228              | -0.0758144                  | -0.0495141                  | 0.8116785                   |
| DTX3        | -0.0168671           | 0.13579167              | 0.20637093                  | 0.21246726                  | 0.56734805                  |
| DTX3L       | -0.2902988           | 0.24125889              | 0.14374381                  | -0.1970529                  | 0.16026177                  |
| DTX4        | 0.21497886           | 0.43301102              | 1.23871977                  | 0.12886078                  | 0.51715146                  |
| DYRK2       | 0.0349522            | 0.15669588              | 0.3768146                   | -0.0879926                  | 0.75471255                  |
| DZIP3       | -0.1924259           | 0.19055054              | -0.2856                     | 0.16801283                  | 0.04689029                  |
| E4F1        | -0.0679404           | 0.19742933              | 0.08133993                  | -0.0942204                  | 0.53394448                  |
| EGFR        | -0.0300243           | 0.32245072              | 0.99045847                  | 0.04010289                  | 0.18987026                  |
| EGR2        | 0.00508277           | 0.07846584              | 0.39646604                  | 0.17853077                  | 0.66265448                  |
| EIF4E2      | -0.3690296           | 0.19867844              | 0.10453792                  | -0.2110916                  | -0.298641                   |
| ENC1        | -0.1554419           | 0.09167875              | 0.07777677                  | -0.0231791                  | 0.0754744                   |
| EPS15       | -0.051689            | 0.13482708              | 0.37653562                  | 0.02637814                  | 0.58208707                  |
| ERCC8       | -0.2960235           | 0.21254639              | 0.05880112                  | -0.0770225                  | -0.0790521                  |
| FAF1        | 0.29331791           | 0.63820947              | 0.07233598                  | 0.34106124                  | 1.94038881                  |
| FAF2        | -0.1076063           | 0.12098986              | 0.0887462                   | -0.0096863                  | 0.61113878                  |
| FAM175A     | -0.2697129           | 0.11259675              | -0.0371474                  | -0.0592748                  | 0.0730626                   |
| FAM175B     | -0.3390343           | 0.17652494              | -0.0743783                  | -0.0019693                  | -0.4465292                  |
| FANCF       | 0.12577852           | 0.1164447               | 0.45922832                  | 0.33359109                  | 0.75592657                  |
| FANCL       | 0.08514852           | 0.64631416              | 0.18167916                  | 1.60742932                  | -0.1629893                  |
| FBXL11      | -0.2385006           | 0.09256046              | 0.06548193                  | -0.0278004                  | -0.1409937                  |
| FBXL12      | -0.2824928           | 0.30008356              | 0.43106443                  | -0.2659719                  | 0.07118738                  |
| FBXL13      | -0.2133096           | 0.06556593              | -0.0912192                  | 0.25285757                  | 0.2829428                   |
| FBXL14      | -0.0549179           | 0.24770967              | 0.35083013                  | 0.22148915                  | 0.17664824                  |
| FBXL15      | -0.189852            | 0.15247174              | 0.40889018                  | 0.20680159                  | -0.0382467                  |
| FBXL16      | 0.04036061           | 0.46973728              | 0.07506024                  | 0.4931415                   | 0.11063934                  |
| FBXL17      | -0.2802454           | 0.19782784              | -0.0972562                  | 0.35028041                  | -0.091945                   |
| FBXL18      | -0.34592             | 0.14562678              | -0.0666708                  | 0.2378124                   | -0.1822083                  |
| FBXL19      | -0.2231782           | 0.23918908              | 0.15757763                  | 0.20539186                  | -0.0851567                  |
| FBXL2       | -0.2464447           | 0.1935198               | 0.26344924                  | -0.0801247                  | -0.2682382                  |
| FBXL20      | -0.0400435           | 0.40214198              | 0.18755271                  | 0.90805684                  | -0.1061475                  |
| FBXL21      | -0.2465079           | 0.1545184               | 0.0562923                   | 0.2334822                   | 0.05251383                  |
| FBXL22      | -0.0565333           | 0.06708651              | 0.23398643                  | 0.23049564                  | 0.2394595                   |
| FBXL3       | -0.1728124           | 0.26926715              | 0.62505774                  | -0.1654332                  | 0.36955835                  |
| FBXL4       | -0.1920416           | 0.23593075              | 0.43455899                  | -0.0449601                  | 0.15618924                  |
| FBXL5       | 0.18397758           | 0.45467603              | 0.25736825                  | 0.06128822                  | 1.20956863                  |
| FBXL6       | -0.1332868           | 0.13634014              | 0.10996682                  | 0.02148445                  | 0.55828262                  |
| FBXL7       | -0.1319447           | 0.0490935               | 0.32861955                  | 0.02092942                  | 0.12328357                  |
| FBXL8       | -0.189445            | 0.25450928              | 0.08456254                  | -0.1634937                  | 0.37016721                  |
| FBXO10      | -0.1469151           | 0.18413201              | 0.21515965                  | -0.0752897                  | 0.68476995                  |
| FBXO11      | -0.001698            | 0.21528752              | 0.07496052                  | 0.296618                    | 0.70245007                  |
| FBXO15      | -0.2847771           | 0.14416621              | -0.0252582                  | -0.0968768                  | 0.25200278                  |
| FBXO16      | -0.0704807           | 0.17336356              | 0.41220566                  | 0.05178029                  | 0.39242328                  |
| FBXO17      | -0.1112761           | 0.17296848              | 0.20646224                  | 0.11777827                  | 0.41269503                  |
| FBXO18      | 0.01123024           | 0.39198335              | 0.57836293                  | 0.27974081                  | 0.34156548                  |
| FBXO2       | -0.1782366           | 0.05965869              | 0.22663111                  | 0.07815246                  | 0.2373893                   |
| FBXO21      | -0.1958365           | 0.06234576              | -0.100351                   | 0.11179378                  | 0.21525463                  |
| FBXO22      | -0.3019766           | 0.14480722              | -0.1411278                  | 0.09156101                  | 0.06253323                  |
| FBXO24      | -0.1337914           | 0.19985837              | 0.15388587                  | 0.29630136                  | -0.0203517                  |
| FBXO25      | 0.04894771           | 0.2345186               | 0.50319756                  | 0.0291786                   | 0.71856545                  |
| FBXO27      | -0.2117894           | 0.0722906               | -0.0937963                  | 0.19449191                  | 0.05920946                  |
| FBXO28      | -0.1925664           | 0.2364008               | 0.43104485                  | 0.06898177                  | -0.109186                   |
| FBXO3       | -0.2325668           | 0.07985904              | -0.0225282                  | -0.0295093                  | 0.06046006                  |
| FBXO30      | -0.0787657           | 0.19883034              | 0.1123942                   | 0.63152781                  | 0.04077834                  |
| FBXO31      | 0.00876487           | 0.24932187              | 0.11665117                  | 0.26124906                  | 0.3255829                   |
| FBXO32      | -0.0131328           | 0.14177323              | 0.06799467                  | 0.24864244                  | 0.48670972                  |
| FBXO33      | -0.1364513           | 0.22972509              | 0.18936537                  | -0.1262801                  | 0.70357185                  |
| FBXO34      | -0.1412382           | 0.0866293               | 0.12905301                  | 0.16293399                  | 0.27590421                  |
| FBXO36      | -0.2137892           | 0.34903141              | -0.1125502                  | -0.277836                   | 0.63642996                  |
| FBXO38      | -0.0852978           | 0.40927173              | 0.06321087                  | 1.1155137                   | -0.2590396                  |
| FBXO39      | 0.13753902           | 0.43772476              | 0.80490698                  | 0.58887788                  | 0.24427418                  |
| FBXO4       | -0.0640639           | 0.41999869              | -0.169316                   | 0.03695453                  | 1.12004442                  |
| FBXO40      | -0.1537118           | 0.12362104              | 0.49771655                  | 0.43814952                  | 0.15221213                  |
| FBXO41      | -0.1546817           | 0.19594271              | -0.1705889                  | -0.04458                    | 0.30990871                  |
| FBXO42      | 0.00668264           | 0.22406129              | 0.64689096                  | 0.49434687                  | 0.13758729                  |
| FBXO43      | -0.1426185           | 0.09868111              | 0.12104789                  | 0.10959345                  | 0.58792687                  |
| FBXO44      | 0.23846576           | 0.34106949              | 0.36288791                  | 0.167054                    | 0.68593478                  |
| FBXO45      | -0.1983245           | 0.19363615              | 0.17045997                  | -0.0168565                  | 0.54139952                  |
| FBXO46      | -0.1300761           | 0.11336268              | 0.39723942                  | -0.0891534                  | 0.29437273                  |
| FBXO47      | 0.00611177           | 0.34645055              | 0.01313693                  | 0.65326788                  | 0.17359794                  |
| FBXO48      | -0.0504527           | 0.08813265              | -0.1396372                  | 0.52415746                  | 0.30673264                  |

| Gene symbol | Integrated intensity | SD Integrated intensity | Mean intensity replicate #1 | Mean intensity replicate #2 | Mean Intensity replicate #3 |
|-------------|----------------------|-------------------------|-----------------------------|-----------------------------|-----------------------------|
| FBXO5       | 0.33590277           | 0.47296985              | -0.1844901                  | -0.0251598                  | -0.236194                   |
| FBXO6       | -0.1782797           | 0.23708577              | 0.24754969                  | -0.0092011                  | -0.1056607                  |
| FBXO7       | -0.2156897           | 0.15374673              | 0.27885578                  | -0.0244203                  | -0.0198133                  |
| FBXO8       | -0.1426707           | 0.05062429              | 0.0922238                   | -0.0092954                  | 0.28752469                  |
| FBXO9       | -0.1951726           | 0.15600007              | -0.116061                   | 0.16366249                  | 0.34004588                  |
| FBXW10      | -0.1451053           | 0.05927314              | 0.19335731                  | 0.08281832                  | 0.21505471                  |
| FBXW11      | -0.0418429           | 0.23628157              | 0.029194                    | 0.4345995                   | 0.58617888                  |
| FBXW12      | -0.1338667           | 0.09114076              | -0.0358587                  | 0.34972892                  | 0.53910067                  |
| FBXW2       | -0.0358931           | 0.32689411              | 0.04646504                  | 0.08546149                  | 0.64404479                  |
| FBXW4       | -0.0901705           | 0.26672785              | 0.32812418                  | 0.13399812                  | 0.0238477                   |
| FBXW5       | 0.14460825           | 0.63870593              | 1.4212588                   | 0.06356108                  | 0.417296                    |
| FBXW7       | -0.2417657           | 0.07118022              | 0.20507537                  | 0.11502289                  | -0.172916                   |
| FBXW8       | -0.1339941           | 0.14181706              | 0.26081565                  | 0.20978797                  | 0.31235351                  |
| FBXW9       | -0.1373919           | 0.14408297              | 0.16406233                  | 0.14607131                  | -0.0667399                  |
| FEM1A       | -0.3429155           | 0.22752997              | -0.4193389                  | -0.0258409                  | -0.1816206                  |
| FEM1B       | -0.0982097           | 0.06774405              | 0.08290569                  | 0.25963004                  | 0.30464269                  |
| FEM1C       | -0.2967025           | 0.04937783              | 0.08877592                  | 0.02829182                  | 0.08934052                  |
| FHIT        | -0.1791385           | 0.10352939              | 0.4099042                   | 0.02295339                  | 0.21870099                  |
| FOXL2       | 0.03294957           | 0.20286116              | 0.01257262                  | 0.36742556                  | 0.34626079                  |
| FOXO1       | -0.3114337           | 0.1267475               | -0.03198                    | -0.1051889                  | 0.2754303                   |
| FZD4        | -0.3400051           | 0.27116611              | -0.0445126                  | 0.16901896                  | -0.34718                    |
| FZD5        | 0.10884732           | 0.36695846              | -0.0142244                  | 0.09067612                  | 0.93919365                  |
| FZD6        | -0.3612759           | 0.33958548              | 0.01034328                  | 0.08276699                  | -0.6228996                  |
| FZD8        | -0.0882459           | 0.1097637               | 0.16536792                  | 0.16034825                  | 0.05840558                  |
| FZR1        | -0.051202            | 0.07420401              | 0.29793077                  | 0.47038185                  | 0.2193472                   |
| GAN         | -0.0678053           | 0.01691325              | 0.12555445                  | 0.11834634                  | 0.06193041                  |
| GAPDH       | -0.0915283           | 0.22849631              | 0.27442773                  | -0.0611832                  | 0.23692007                  |
| GGN         | -0.0828637           | 0.35773838              | 0.03114268                  | 0.07455638                  | 0.95152145                  |
| GLMN        | 0.06216446           | 0.33212172              | 0.60673012                  | 0.04552541                  | 0.50487826                  |
| GPR37       | -0.1524236           | 0.2408425               | 0.46511995                  | -0.2752131                  | 0.05798597                  |
| GRIK2       | -0.0194196           | 0.14950003              | 0.20061025                  | 0.00857974                  | 0.75488379                  |
| GSK3B       | 0.14965416           | 0.44262783              | 0.4141381                   | 0.15247898                  | 1.29652964                  |
| GTPBP4      | -0.2161764           | 0.12695584              | 0.22189415                  | 0.19661503                  | 0.1199254                   |
| HACE1       | 0.13003076           | 0.51133969              | -0.166526                   | 1.40043256                  | 0.81436805                  |
| HAMP        | -0.2034088           | 0.06785461              | 0.09011915                  | 0.30319952                  | 0.06106312                  |
| HDAC6       | 0.03681941           | 0.40397828              | 0.16882334                  | 0.10671777                  | 1.08832806                  |
| HECTD1      | -0.0576734           | 0.14459391              | 0.48689641                  | 0.13187528                  | 0.29876765                  |
| HECTD2      | -0.1049021           | 0.32772477              | -0.0489697                  | -0.0601429                  | 0.710662                    |
| HECTD3      | 0.03543614           | 0.25526817              | 0.60757555                  | 0.25418201                  | 0.14103895                  |
| HECW1       | -0.0279423           | 0.04923303              | 0.24733669                  | 0.12213537                  | 0.5247407                   |
| HECW2       | -0.1466551           | 0.04704299              | 0.11560971                  | 0.25874858                  | 0.36759402                  |
| HERC1       | -0.073544            | 0.33987333              | 0.0431987                   | 0.37511345                  | -0.0075343                  |
| HERC2       | 0.13791511           | 0.35798672              | 0.65757356                  | 0.08189556                  | 0.54478042                  |
| HERC3       | -0.3722343           | 0.13591273              | -0.1146053                  | -0.0833982                  | -0.1025734                  |
| HERC4       | -0.2087767           | 0.03010706              | 0.13721317                  | 0.02332506                  | 0.28735101                  |
| HERC5       | -0.2266378           | 0.25367126              | 0.39159939                  | -0.2230588                  | 0.34812406                  |
| HERC6       | -0.075238            | 0.61172312              | 0.72806006                  | -0.0798228                  | -0.0821415                  |
| HFE         | -0.0813798           | 0.20265377              | 0.50128033                  | -0.0646625                  | 0.34889916                  |
| HIF1A       | -0.191981            | 0.19389276              | 0.3945367                   | -0.0330343                  | -0.1433236                  |
| HLTF        | -0.2630945           | 0.02451375              | 0.02866256                  | -0.0507819                  | 0.0376067                   |
| HM13        | -0.1849374           | 0.07160897              | 0.05768188                  | 0.15359051                  | 0.21158851                  |
| HPRT1       | -0.3578736           | 0.08923489              | -0.1334662                  | -0.1951615                  | 0.01020377                  |
| HSPA1A      | -0.0980212           | 0.27523422              | 0.2334384                   | 0.34549686                  | 0.15399308                  |
| HSPA1B      | -0.2234675           | 0.16784125              | 0.26407399                  | -0.0434414                  | -0.0533595                  |
| HSPA5       | -0.2353182           | 0.18261128              | -0.1045835                  | -0.284241                   | 0.30686453                  |
| HSPA8       | -0.2390147           | 0.32664292              | 0.00927679                  | -0.1408053                  | -0.6509758                  |
| HSPA9       | -0.2748257           | 0.25377328              | -0.0468994                  | -0.3099879                  | -0.4199004                  |
| HSPB1       | 0.28204426           | 0.71081974              | 1.14036157                  | 0.24767673                  | 0.18332183                  |
| HSPBP1      | -0.1360178           | 0.1887801               | 0.27718864                  | -0.0695436                  | 0.52222842                  |
| HSPD1       | -0.029888            | 0.29317164              | 0.32494473                  | -0.103749                   | -0.0314997                  |
| HUWE1       | -0.1905237           | 0.12780364              | 0.01353386                  | 0.16768843                  | 0.23533816                  |
| IDE         | -0.2213513           | 0.15985585              | 0.1858336                   | -0.2340368                  | -0.2610242                  |
| IKBK        | -0.0858044           | 0.13412942              | 0.12186776                  | 0.19502224                  | 0.27826037                  |
| IRAK1       | -0.3972893           | 0.06772776              | -0.2081391                  | -0.322898                   | 0.04108309                  |
| IRF2BP1     | -0.0697855           | 0.08069936              | 0.13755428                  | 0.15885666                  | 0.38870041                  |
| IRF2BPL     | -0.237545            | 0.06614576              | 0.10217723                  | 0.21057379                  | 0.25742379                  |
| ITCH        | -0.3782798           | 0.17866489              | -0.5294555                  | 0.10740678                  | 0.07656683                  |
| KBTBD5      | -0.0941875           | 0.49142021              | -0.2719804                  | 0.30076988                  | 0.06096232                  |
| KBTBD7      | 0.36135636           | 0.8522789               | 0.47136491                  | 2.17214297                  | 0.03971815                  |
| KCNH2       | -0.304347            | 0.22394098              | 0.15868286                  | -0.5204901                  | 0.06691732                  |
| KCNQ3       | 0.12063419           | 0.3088855               | 0.35882855                  | -0.0204632                  | 0.7921513                   |
| KCTD10      | 0.1384847            | 0.38713262              | 0.67683712                  | 0.61023436                  | 0.10172719                  |
| KCTD11      | -0.2347153           | 0.076057                | -0.0975125                  | -0.0036147                  | 0.06596111                  |
| KCTD13      | -0.179635            | 0.19996833              | -0.0904163                  | 0.22007431                  | 0.58231256                  |
| KDM2B       | -0.0298321           | 0.39990853              | 0.84782818                  | 0.01367771                  | 0.00705094                  |
| KDM4A       | -0.0662527           | 0.38621944              | 0.39065036                  | -0.1287359                  | 0.11704864                  |
| KEAP1       | -0.2401153           | 0.18170246              | -0.2482464                  | 0.07435518                  | -0.0743288                  |
| KIAA0776    | -0.1286279           | 0.16193934              | 0.38561156                  | 0.09453144                  | 0.13889882                  |
| KIAA1333    | -0.1421585           | 0.22508233              | -0.0604272                  | -0.1089987                  | 0.615535                    |
| KIAA1530    | -0.1137523           | 0.16517856              | -0.0342131                  | 0.43232339                  | -0.0465239                  |
| KIF18A      | 0.15171798           | 0.38435121              | 0.50247472                  | 0.4507259                   | 0.07871398                  |
| KLHL10      | 0.00647974           | 0.42809256              | 0.21371165                  | 0.03629784                  | 1.26769379                  |

| Gene symbol | Integrated intensity | SD Integrated intensity | Mean intensity replicate #1 | Mean intensity replicate #2 | Mean Intensity replicate #3 |
|-------------|----------------------|-------------------------|-----------------------------|-----------------------------|-----------------------------|
| KLHL12      | -0.0144102           | 0.41714867              | -0.3264582                  | 0.67050871                  | 0.46004835                  |
| KLHL13      | -0.0589574           | 0.11928812              | 0.15151673                  | 0.34535552                  | 0.21383867                  |
| KLHL15      | -0.1907362           | 0.24996514              | -0.3361095                  | 0.74704781                  | 0.10301221                  |
| KLHL17      | -0.2254232           | 0.20114238              | 0.18058574                  | -0.2211704                  | 0.17431222                  |
| KLHL2       | -0.0056457           | 0.10748309              | 0.51901271                  | 0.10817396                  | 0.3227433                   |
| KLHL20      | -0.230161            | 0.14493587              | -0.2226554                  | 0.03406209                  | 0.00961077                  |
| KLHL21      | 0.3650807            | 0.26361931              | 0.94197437                  | 0.32774991                  | 0.70658842                  |
| KLHL22      | -0.1781878           | 0.17712133              | 0.12186958                  | -0.1132704                  | 0.1255468                   |
| KLHL24      | -0.3706944           | 0.08293339              | -0.2661723                  | -0.1604558                  | 0.13110486                  |
| KLHL25      | 0.02534137           | 0.30553547              | -0.276104                   | 0.77121663                  | 0.44831199                  |
| KLHL3       | -0.1294507           | 0.12055506              | 0.19625361                  | 0.00938297                  | 0.51251114                  |
| KLHL36      | -0.2222669           | 0.2063425               | 0.23639736                  | -0.3721496                  | 0.18341375                  |
| KLHL41      | -0.031712            | 0.0142218               | 0.38496189                  | 0.20125208                  | 0.58797286                  |
| KLHL42      | -0.4150511           | 0.00997117              | -0.1704447                  | -0.0905083                  | -0.1594119                  |
| KLHL7       | -0.3134348           | 0.1737087               | 0.13169937                  | -0.4135912                  | 0.14769595                  |
| KLHL8       | -0.3100601           | 0.11322337              | -0.1759344                  | 0.22281096                  | 0.04804189                  |
| KLHL9       | -0.3771612           | 0.26196096              | -0.311489                   | 0.42852332                  | -0.1382824                  |
| KMT2C       | -0.1806906           | 0.15173588              | 0.26793131                  | 0.37272882                  | -0.1540204                  |
| LEO1        | -0.2888221           | 0.12536616              | -0.0169459                  | 0.06079254                  | 0.0421751                   |
| LMO7        | -0.0560937           | 0.0432995               | 0.28573213                  | 0.02769757                  | -0.0502401                  |
| LNPEP       | -0.25792             | 0.20268                 | -0.3048                     | 0.333538                    | 0.197873                    |
| LNX1        | -0.1340801           | 0.30171157              | 0.07416563                  | 0.61539147                  | -0.292078                   |
| LNX2        | -0.1624916           | 0.15961458              | 0.21824395                  | 0.30228495                  | 0.15058431                  |
| LOC283116   | -0.077287            | 0.11391179              | 0.33550233                  | 0.11717836                  | 0.3606027                   |
| LONRF1      | -0.1212875           | 0.1507182               | 0.21429362                  | 0.1040079                   | -0.0381508                  |
| LONRF2      | -0.20547             | 0.24175073              | -0.2188518                  | 0.08948092                  | 0.54091221                  |
| LONRF3      | -0.0593535           | 0.1047196               | -0.1417842                  | 0.36750173                  | 0.02880367                  |
| LRR1        | -0.1014559           | 0.18876564              | 0.01474621                  | -0.1022616                  | 0.24757955                  |
| LRRC41      | -0.0614414           | 0.16434477              | 0.18508995                  | 0.07958777                  | -0.0624422                  |
| LRRK2       | -0.1944541           | 0.05224665              | -0.102925                   | 0.20784635                  | 0.34750252                  |
| LRSAM1      | 0.19780621           | 0.37100708              | 0.40192405                  | 0.12640841                  | 1.00805575                  |
| LTBR        | 0.006963             | 0.121253                | 0.508432                    | 0.396697                    | 0.450395                    |
| LYN         | -0.13905             | 0.332212                | -0.02949                    | 0.255834                    | -0.30081                    |
| MAD1L1      | -0.2562332           | 0.10511706              | 0.11724248                  | -0.0949864                  | 0.03221376                  |
| MAD2L1      | 0.179678             | 0.260276                | 0.606017                    | 0.312243                    | 0.266174                    |
| MAD2L2      | -0.1141062           | 0.10198741              | -0.189057                   | 0.36488998                  | 0.24518753                  |
| MAGEA2      | 0.352366             | 0.85047                 | 1.806179                    | 0.211079                    | 0.136623                    |
| MAGEA2B     | -0.1561076           | 0.08632147              | 0.21274704                  | 0.18596694                  | 0.14509507                  |
| MAGEC2      | 0.00075433           | 0.19932408              | 0.59836955                  | 0.65217124                  | 0.21621369                  |
| MALT1       | 0.04390659           | 0.21520122              | 0.62906674                  | 0.09409884                  | 0.47489111                  |
| MAP3K1      | -0.05658             | 0.202513                | 0.148514                    | 0.226                       | 0.34024                     |
| MAP3K7IP2   | -0.1595113           | 0.09544864              | 0.40000987                  | 0.06514522                  | 0.1152483                   |
| MARCH1      | -0.0185753           | 0.34533512              | 0.21461128                  | 0.10526458                  | 1.14184848                  |
| MARCH10     | 0.09905681           | 0.24477459              | 0.68390807                  | -0.0372033                  | 0.45536676                  |
| MARCH11     | -0.2262029           | 0.21662171              | -0.0526597                  | -0.0435694                  | 0.30229451                  |
| MARCH2      | -0.3760198           | 0.07768417              | 0.0550681                   | 0.02754452                  | 0.00969158                  |
| MARCH3      | 0.04841663           | 0.47479757              | -0.2205838                  | 0.7655218                   | 0.35884052                  |
| MARCH4      | -0.2606582           | 0.04357116              | 0.08226746                  | -0.1341101                  | 0.17187304                  |
| MARCH5      | -0.177205            | 0.1354749               | 0.21242129                  | 0.24380413                  | 0.42232011                  |
| MARCH6      | -0.0034524           | 0.4589948               | -0.0103662                  | 0.10645257                  | 1.53766532                  |
| MARCH7      | -0.0274609           | 0.22473287              | 0.2205122                   | 0.14999857                  | 0.61032541                  |
| MARCH8      | -0.0470058           | 0.21391712              | 0.22414478                  | 0.37712968                  | 0.24354387                  |
| MARCH9      | -0.1633662           | 0.29409347              | 0.05928825                  | -0.299784                   | 0.41149579                  |
| MARK4       | 0.06662189           | 0.174551                | 0.34064407                  | 0.36495136                  | 0.10964527                  |
| MC1R        | -0.19056             | 0.200792                | 0.272                       | -0.35245                    | 0.02163                     |
| MC4R        | -0.03532             | 0.312693                | 0.03521                     | 0.225339                    | 0.228578                    |
| MDM2        | -0.11756             | 0.297448                | -0.13811                    | 0.537483                    | 0.421126                    |
| MDM4        | -0.24996             | 0.084556                | -0.14378                    | 0.126133                    | 0.213345                    |
| MED1        | -0.2662              | 0.107495                | -0.06303                    | -0.01461                    | 0.138945                    |
| MED10       | -0.1264885           | 0.1253459               | 0.09559531                  | 0.46200864                  | 0.10578546                  |
| MED11       | -0.1739716           | 0.11618033              | -0.0100728                  | -0.2646175                  | 0.49991153                  |
| MED12       | -0.4676765           | 0.17118378              | -0.4658823                  | -0.5010203                  | -0.6529832                  |
| MED17       | -0.0935011           | 0.13380412              | -0.074968                   | 0.09732031                  | 0.46319795                  |
| MED20       | -0.139155            | 0.06848161              | -0.0633856                  | 0.13573259                  | 0.30370552                  |
| MED21       | -0.0468551           | 0.11345837              | 0.03908198                  | 0.24473081                  | 0.22678329                  |
| MED23       | 0.06728343           | 0.32082867              | 0.15104879                  | 0.19013958                  | 0.9969531                   |
| MED24       | -0.4196461           | 0.1989235               | -0.3074495                  | -0.03775                    | -0.3973668                  |
| MED27       | -0.1212566           | 0.09810914              | 0.30037658                  | 0.04421585                  | 0.27869495                  |
| MED31       | 0.07715824           | 0.36138702              | 0.75212503                  | 0.012426                    | 0.0938953                   |
| MED6        | -0.482319            | 0.14638988              | -0.4361437                  | -0.4506616                  | -0.4761138                  |
| MED7        | -0.2158397           | 0.06646741              | 0.00240361                  | 0.08041111                  | 0.31919436                  |
| MED8        | -0.2182916           | 0.14129105              | -0.3918757                  | -0.3437573                  | 0.31679812                  |
| MEX3A       | -0.2782543           | 0.23482337              | -0.5132837                  | 0.15932594                  | 0.50443333                  |
| MEX3B       | -0.1494724           | 0.26123534              | -0.1437865                  | 0.72013387                  | 0.18581449                  |
| MEX3C       | -0.1664921           | 0.08736862              | 0.26263496                  | 0.24086785                  | 0.16593872                  |
| MEX3D       | -0.1488606           | 0.15886215              | 0.10748175                  | 0.09080845                  | 0.29043836                  |
| MFN2        | -0.1364186           | 0.06270874              | 0.09312897                  | 0.01540188                  | 0.44667891                  |
| MGRN1       | -0.0399642           | 0.20934597              | 0.36320987                  | 0.41848566                  | 0.02474817                  |
| MIB1        | -0.1194456           | 0.14420028              | 0.43246442                  | 0.32213723                  | 0.05358077                  |
| MIB2        | -0.0835372           | 0.19704524              | -0.1311635                  | 0.22078068                  | 0.41807778                  |
| MID1        | -0.05994             | 0.072253                | 0.218708                    | 0.197493                    | 0.455407                    |
| MID2        | -0.0698562           | 0.24588101              | 0.52218756                  | 0.07102624                  | 0.16420098                  |

| Gene symbol | Integrated intensity | SD Integrated intensity | Mean intensity replicate #1 | Mean intensity replicate #2 | Mean Intensity replicate #3 |
|-------------|----------------------|-------------------------|-----------------------------|-----------------------------|-----------------------------|
| MKRN1       | -0.3524898           | 0.01592209              | -0.16334                    | -0.1504911                  | -0.0811678                  |
| MKRN2       | -0.1714008           | 0.16091397              | 0.23640742                  | -0.0135369                  | 0.18394698                  |
| MKRN3       | -0.1912255           | 0.07632711              | -0.1524903                  | 0.07946785                  | 0.14694147                  |
| MLL2        | -0.0169736           | 0.15048098              | 0.32389061                  | -0.0396289                  | 0.15645456                  |
| MNAT1       | -0.12514             | 0.071519                | -0.04047                    | 0.277397                    | 0.406334                    |
| MOAP1       | -0.2424978           | 0.06777011              | 0.12612217                  | 0.20357353                  | 0.00410563                  |
| MOCS3       | -0.2585599           | 0.27248121              | -0.0081405                  | -0.0036136                  | -0.3152813                  |
| MSL2        | -0.166714            | 0.14055233              | 0.12697804                  | 0.19782745                  | 0.39493488                  |
| MTMR15      | -0.1267508           | 0.08974194              | -0.0158617                  | 0.04591098                  | -0.1628567                  |
| MUL1        | -0.2624687           | 0.11294538              | -0.0097308                  | 0.10251284                  | -0.1464558                  |
| MVB12A      | 0.041615             | 0.24487985              | 0.4948942                   | 0.08290492                  | 0.61270529                  |
| MYCBP2      | -0.1459081           | 0.12029467              | 0.28574159                  | 0.05389246                  | -0.0772112                  |
| MYLIP       | 0.18034865           | 0.42113836              | 0.7018653                   | 0.52552368                  | 0.14226131                  |
| MYOD1       | -0.21074             | 0.089855                | -0.05871                    | 0.148854                    | 0.107803                    |
| N4BP1       | -0.2447075           | 0.03718293              | -0.004757                   | -0.0556368                  | 0.10932705                  |
| NAE1        | -0.0059572           | 0.19372051              | 0.63180069                  | -0.0783016                  | 0.18480322                  |
| NAIP        | -0.02453             | 0.313504                | -0.14883                    | 0.370511                    | 0.522062                    |
| NBR1        | -0.34803             | 0.184                   | -0.42528                    | 0.08671                     | -0.12113                    |
| NDFIP1      | -0.0018739           | 0.32598949              | 0.17276287                  | 0.58523533                  | 0.09276155                  |
| NDFIP2      | -0.2635675           | 0.44736516              | 0.44315669                  | -0.1490974                  | -0.2443766                  |
| NEDD4       | -0.29245             | 0.140753                | 0.031444                    | 0.165261                    | 0.005473                    |
| NEDD4L      | -0.0535132           | 0.118967                | -0.0477801                  | 0.15996509                  | 0.51786503                  |
| NEDD8       | 0.679765             | 0.35029                 | 0.786729                    | 1.233098                    | 0.828195                    |
| NEURL       | -0.1958698           | 0.09130546              | 0.21559334                  | -0.0091243                  | 0.09325718                  |
| NEURL1B     | -0.1042445           | 0.19348506              | 0.45032688                  | -0.0280368                  | 0.30105712                  |
| NEURL2      | 0.03453454           | 0.29796726              | -0.2655701                  | 0.70785536                  | 0.6223563                   |
| NEUROD2     | -0.0133              | 0.288368                | 0.254259                    | 0.616577                    | 0.301897                    |
| NFE2L2      | -0.1143              | 0.113052                | 0.383381                    | -0.04422                    | 0.43661                     |
| NFKBIA      | -0.16902             | 0.221124                | -0.04385                    | 0.12879                     | 0.39186                     |
| NFX1        | -0.21953             | 0.172225                | 0.199423                    | 0.310186                    | 0.144184                    |
| NFXL1       | -0.2565689           | 0.19305549              | -0.0054815                  | -0.0986729                  | 0.3214452                   |
| NGFR        | -0.16777             | 0.161144                | -0.09274                    | 0.323341                    | 0.125088                    |
| NHLRC1      | -0.1505152           | 0.24523587              | -0.1422612                  | 0.10781597                  | 0.76802146                  |
| NKD2        | 0.04964496           | 0.23259623              | 0.64118099                  | 0.20516178                  | 0.30350727                  |
| NLK         | -0.0831361           | 0.23401649              | 0.57636123                  | -0.0554922                  | 0.3693513                   |
| NLRC4       | -0.1544633           | 0.1103988               | 0.22143847                  | 0.36851711                  | 0.01347089                  |
| NOSIP       | 0.06862161           | 0.19467563              | 0.04456446                  | 0.10856966                  | 1.08066557                  |
| NPEPPS      | -0.0320964           | 0.11273643              | 0.15053429                  | 0.20972751                  | 0.56658444                  |
| NSD1        | 0.00672497           | 0.15029888              | 0.32968714                  | 0.04913628                  | 0.30569788                  |
| NSFL1C      | -0.0360871           | 0.21747149              | 0.53357521                  | 0.28243292                  | 0.2086008                   |
| NSMCE1      | -0.3104162           | 0.23087376              | -0.1855133                  | -0.0744794                  | 0.59238318                  |
| NSMCE2      | -0.1101773           | 0.20894798              | 0.13530038                  | 0.18441725                  | 0.6300042                   |
| NUB1        | -0.257314            | 0.05676297              | 0.084132                    | 0.36982318                  | 0.14059252                  |
| NUP62       | 0.33716214           | 0.29298478              | 0.08482998                  | 0.17346106                  | 1.29584919                  |
| NXN         | -0.2857333           | 0.27523044              | 0.21421173                  | -0.1697089                  | -0.0532932                  |
| OPTN        | -0.1459334           | 0.18997156              | 0.29531103                  | 0.19177615                  | -0.0294237                  |
| OSTM1       | -0.1497841           | 0.28555396              | 0.27917855                  | 0.39886337                  | -0.4251151                  |
| PA2G4       | -0.35596             | 0.201141                | -0.04015                    | -0.0916                     | -0.24004                    |
| PACRG       | -0.3979888           | 0.05035352              | -0.1843071                  | -0.1491441                  | 0.02229801                  |
| PAF1        | -0.2359333           | 0.22172295              | 0.41956258                  | -0.0870926                  | 0.03847078                  |
| PARK2       | -0.20697             | 0.044496                | -0.01247                    | 0.111029                    | 0.096362                    |
| PARK7       | -0.0951715           | 0.1498853               | 0.45585617                  | 0.07949704                  | 0.02668162                  |
| PARP10      | -0.1385464           | 0.39611131              | 0.13076407                  | -0.4205911                  | 0.5329195                   |
| PATZ1       | -0.2089843           | 0.24578164              | 0.26086467                  | 0.08283657                  | -0.1071692                  |
| PAX6        | -0.2512              | 0.224636                | -0.17082                    | 0.202979                    | 0.032443                    |
| PAXIP1      | -0.1526373           | 0.05339881              | -0.0542245                  | 0.05362964                  | 0.00399747                  |
| PCBP2       | -0.27427             | 0.037435                | -0.13535                    | 0.043408                    | 0.034279                    |
| PCGF1       | -0.0845081           | 0.0752435               | -0.0453819                  | 0.16319113                  | 0.37402907                  |
| PCGF2       | -0.2627821           | 0.08335385              | 0.08601988                  | 0.00366502                  | 0.24121228                  |
| PCGF3       | -0.0859819           | 0.34267277              | -0.0586165                  | 0.19101464                  | 1.19607019                  |
| PCGF5       | -0.0815501           | 0.0698231               | 0.14718942                  | 0.09807574                  | 0.3536264                   |
| PCGF6       | -0.1665847           | 0.01929386              | -0.0563077                  | 0.30969098                  | 0.34375801                  |
| PCNP        | -0.2112114           | 0.16686732              | -0.0344437                  | 0.50699851                  | 0.00285943                  |
| PDCL3       | 0.03382568           | 0.17373499              | 0.21172367                  | 0.50384043                  | 0.39732143                  |
| PDE4D       | -0.10944             | 0.338405                | 0.516476                    | -0.23662                    | 0.87638                     |
| PDZD4       | 0.10647846           | 0.18281475              | 0.36472963                  | 0.33745671                  | 0.70687215                  |
| PDZRN3      | -0.0177594           | 0.21840283              | 0.41500685                  | 0.03122358                  | 0.38676458                  |
| PDZRN4      | -0.2405344           | 0.17531172              | 0.33337456                  | 0.0094203                   | 0.00594937                  |
| PELI1       | -0.1618615           | 0.0712519               | 0.12050787                  | 0.23764501                  | 0.2429688                   |
| PELI2       | -0.3021219           | 0.24490452              | 0.03204328                  | -0.0603417                  | 0.22865242                  |
| PELI3       | 0.03785665           | 0.27178701              | 0.48489372                  | 0.0918902                   | 0.24370243                  |
| PER1        | -0.13077             | 0.215571                | 0.127342                    | 0.437947                    | 0.173822                    |
| PER2        | -0.2334988           | 0.11998607              | -0.136489                   | 0.1952856                   | -0.0472857                  |
| PER3        | -0.1276548           | 0.05895785              | 0.08840408                  | 0.20234383                  | 0.22252789                  |
| PEX10       | 0.071173             | 0.15559                 | 0.197715                    | 0.219876                    | 0.950166                    |
| PEX12       | 0.073141             | 0.14907                 | 0.387983                    | -0.02559                    | 0.570809                    |
| PEX2        | -0.16561             | 0.229313                | 0.362315                    | 0.058908                    | -0.36399                    |
| PHC1        | -0.0398011           | 0.26262989              | 0.50578025                  | -0.1839716                  | 0.46639985                  |
| PHF14       | -0.1760231           | 0.03484003              | 0.10520404                  | 0.0349122                   | 0.24870967                  |
| PHF21A      | -0.3127798           | 0.14387198              | -0.2067537                  | 0.0455422                   | 0.19144393                  |
| PHF7        | 0.05019946           | 0.32081174              | 0.94330593                  | 0.55773394                  | 0.21104688                  |
| PHIP        | -0.2294895           | 0.04720756              | -0.1181596                  | -0.2763278                  | 0.10485219                  |

| Gene symbol | Integrated intensity | SD Integrated intensity | Mean intensity replicate #1 | Mean intensity replicate #2 | Mean Intensity replicate #3 |
|-------------|----------------------|-------------------------|-----------------------------|-----------------------------|-----------------------------|
| PHRF1       | -0.0346533           | 0.08034804              | -0.0077939                  | 0.50611642                  | 0.36037843                  |
| PIAS1       | -0.1202094           | 0.0597583               | 0.13129319                  | 0.24469421                  | -0.0929                     |
| PIAS2       | 0.10691581           | 0.22684099              | 0.26689205                  | 0.33394366                  | 0.76145836                  |
| PIAS3       | -0.1625508           | 0.09487286              | 0.20448502                  | 0.08193617                  | 0.22399885                  |
| PIAS4       | 0.08611266           | 0.07301239              | 0.44087299                  | 0.55658404                  | 0.71810694                  |
| PINK1       | 0.23664302           | 0.2017747               | 0.45825426                  | 0.83915021                  | 0.61463925                  |
| PJA1        | -0.2572993           | 0.2335613               | -0.270507                   | 0.02823389                  | 0.52644832                  |
| PJA2        | -0.2179894           | 0.24119105              | 0.37804891                  | 0.19145613                  | -0.1498985                  |
| PLK1        | 1.274836             | 0.393583                | 1.574699                    | 1.64081                     | 1.243434                    |
| PML         | 0.05394              | 0.138287                | 0.283215                    | -0.06951                    | 0.74425                     |
| POLR2A      | -0.42185             | 0.259079                | -0.46786                    | -0.41289                    | 0.371471                    |
| POU5F1      | 0.003519             | 0.154905                | 0.254026                    | 0.339511                    | 0.542774                    |
| PPARA       | -0.12134             | 0.167473                | -0.16667                    | 0.341383                    | 0.137556                    |
| PPARGC1A    | -0.0297676           | 0.11016246              | 0.4764355                   | 0.19063562                  | 0.07974857                  |
| PPIL2       | 0.24009473           | 0.31459216              | 0.60099544                  | 0.13267204                  | 1.10681432                  |
| PRICKLE1    | -0.042597            | 0.27196797              | 0.33693103                  | 0.20583165                  | 0.27760796                  |
| PRKACA      | -0.09822             | 0.554315                | -0.283                      | 0.056838                    | 1.372864                    |
| PRKACB      | -0.25061             | 0.044767                | 0.069223                    | -0.03018                    | 0.217085                    |
| PRKAR1A     | -0.10867             | 0.345391                | -0.38192                    | 0.536176                    | 0.351543                    |
| PRKAR2A     | -0.20347             | 0.295877                | -0.41506                    | 0.154347                    | 0.385106                    |
| PRKAR2B     | -0.30973             | 0.314065                | -0.30259                    | 0.168579                    | -0.25026                    |
| PRKCQ       | -0.23762             | 0.157267                | -0.19211                    | 0.203374                    | 0.335949                    |
| PRMT3       | -0.1996981           | 0.07903485              | 0.10780119                  | 0.11517952                  | 0.04455127                  |
| PRPF19      | 0.27094501           | 0.02433482              | 0.56263024                  | 0.21269165                  | 0.22090701                  |
| PSMA1       | 0.107568             | 0.316068                | 0.338429                    | 0.429548                    | 0.311964                    |
| PSMA2       | 0.098242             | 0.188711                | 0.294897                    | 0.36488                     | 0.210772                    |
| PSMA3       | 0.458228             | 0.298049                | 0.612971                    | 0.192772                    | 1.130059                    |
| PSMA4       | -0.00314             | 0.347777                | -0.24191                    | 0.190785                    | 0.698813                    |
| PSMA5       | 0.394178             | 0.447481                | 0.603101                    | 0.069131                    | 1.024982                    |
| PSMA6       | 0.461976             | 0.604614                | 0.409284                    | 0.111667                    | 2.074862                    |
| PSMA7       | 0.049574             | 0.292492                | 0.489722                    | 0.107052                    | 0.220349                    |
| PSMA8       | -0.2000171           | 0.14117287              | -0.1047359                  | 0.04581808                  | 0.47992322                  |
| PSMB1       | 0.239438             | 0.292527                | 0.328597                    | 0.281014                    | 0.766596                    |
| PSMB10      | 0.093767             | 0.388077                | 0.095279                    | 0.540404                    | 0.405997                    |
| PSMB11      | -0.1709146           | 0.13764434              | 0.14547128                  | 0.29162628                  | 0.03519738                  |
| PSMB2       | 0.082734             | 0.079304                | 0.458825                    | 0.354861                    | 0.597143                    |
| PSMB3       | 0.105073             | 0.227349                | 0.177611                    | 0.361735                    | 0.440675                    |
| PSMB4       | 0.241668             | 0.374622                | 0.383511                    | 0.134248                    | 0.807783                    |
| PSMB5       | 0.24595              | 0.057327                | 0.497916                    | 0.460083                    | 0.922509                    |
| PSMB6       | 0.427902             | 0.9412                  | 0.227807                    | 0.037447                    | 2.234337                    |
| PSMB7       | 0.09232              | 0.193387                | 0.441075                    | 0.12602                     | 0.281923                    |
| PSMB8       | -0.18501             | 0.050178                | 0.305019                    | 0.098501                    | 0.358756                    |
| PSMB9       | -0.09106             | 0.0944                  | 0.095354                    | 0.079852                    | 0.714389                    |
| PSMC1       | 1.597721             | 1.076616                | 3.509806                    | 1.020804                    | 1.968912                    |
| PSMC2       | 1.055021             | 0.553661                | 0.63181                     | 1.549906                    | 2.129981                    |
| PSMC3       | 1.177703             | 0.372407                | 1.859045                    | 1.094045                    | 1.821123                    |
| PSMC4       | 1.266393             | 0.489084                | 1.576626                    | 0.86871                     | 2.387118                    |
| PSMC5       | 1.546048             | 0.610048                | 1.897168                    | 0.871911                    | 2.683385                    |
| PSMC6       | 1.242154             | 0.884064                | 1.828373                    | 0.402154                    | 2.908569                    |
| PSMD1       | 2.17775              | 0.238019                | 2.175038                    | 1.816037                    | 3.008871                    |
| PSMD10      | -0.02779             | 0.098252                | 0.244424                    | 0.221731                    | 0.464923                    |
| PSMD11      | 1.276351             | 0.547117                | 1.150305                    | 0.85809                     | 2.131872                    |
| PSMD12      | 1.221809             | 0.616611                | 0.814699                    | 0.564291                    | 2.630497                    |
| PSMD13      | 0.334372             | 0.324961                | 0.436817                    | 0.226327                    | 0.353087                    |
| PSMD2       | 0.929245             | 0.943423                | 0.156846                    | 1.478136                    | 2.398565                    |
| PSMD3       | 1.600412             | 0.456159                | 1.184995                    | 2.299582                    | 1.889189                    |
| PSMD4       | 0.317669             | 0.258594                | 0.418659                    | 0.17067                     | 0.951105                    |
| PSMD5       | -0.10857             | 0.103821                | 0.16888                     | 0.363131                    | 0.285213                    |
| PSMD6       | 1.55223503           | 0.3762499               | 1.35504204                  | 1.06101809                  | 1.90644998                  |
| PSMD8       | 1.882899             | 1.475375                | 3.020047                    | 1.184859                    | 0.850128                    |
| PSMD9       | -0.10527             | 0.066395                | 0.072988                    | 0.214474                    | 0.410935                    |
| PSME1       | -0.23038             | 0.270007                | 0.214272                    | -0.28453                    | 0.212392                    |
| PSME2       | -0.07291             | 0.240604                | -0.35244                    | 0.379445                    | 0.295881                    |
| PSME3       | -0.1955146           | 0.16062338              | -0.0087063                  | 0.15185241                  | -0.2716568                  |
| PSME4       | -0.0097915           | 0.28757529              | 0.2089758                   | 0.05192656                  | 0.84239678                  |
| PSMF1       | -0.2200394           | 0.14636191              | -0.0891777                  | -0.2060476                  | 0.38529161                  |
| PTTG1IP     | -0.1807065           | 0.3743264               | -0.3050877                  | 0.13922906                  | 0.64124693                  |
| RAB40A      | -0.0812872           | 0.13149102              | 0.04495339                  | 0.23477357                  | 0.32308257                  |
| RAB40AL     | -0.1211773           | 0.1044954               | 0.01072946                  | 0.44280152                  | 0.4269805                   |
| RAB40B      | -0.1739407           | 0.15790936              | 0.01138301                  | -0.0208004                  | 0.51914851                  |
| RAB40C      | -0.2095815           | 0.17679896              | 0.08879867                  | 0.31993081                  | -0.1814172                  |
| RABGEF1     | -0.0699652           | 0.31629632              | 0.58050901                  | -0.0487598                  | 0.52597558                  |
| RAD18       | -0.1348013           | 0.29568378              | 0.04339759                  | 0.67883026                  | -0.2236379                  |
| RAD23A      | 0.41348525           | 0.95562361              | 1.54454725                  | -0.1570473                  | 0.08499686                  |
| RAD23B      | 0.00769406           | 0.18805933              | 0.14301758                  | 0.1892528                   | 0.79690296                  |
| RAD51       | -0.1386196           | 0.07167964              | 0.07673236                  | 0.0022949                   | 0.26953374                  |
| RAG1        | -0.0122251           | 0.07583968              | 0.14051366                  | 0.24789457                  | 0.38684789                  |
| RAG2        | -0.0339642           | 0.34400104              | -0.2386124                  | 0.08249772                  | 1.15083695                  |
| RALA        | -0.0939431           | 0.05352387              | 0.12379601                  | 0.18296534                  | 0.65284576                  |
| RALB        | 0.02968886           | 0.1313351               | 0.20150054                  | 0.23539119                  | 0.54639527                  |
| RANGAP1     | -0.1226516           | 0.24045841              | 0.35970967                  | -0.1414512                  | 0.3359599                   |
| RAPSN       | 0.09500136           | 0.08486284              | 0.23284574                  | 0.20173973                  | 0.71909735                  |

| Gene symbol | Integrated intensity | SD Integrated intensity | Mean intensity replicate #1 | Mean intensity replicate #2 | Mean Intensity replicate #3 |
|-------------|----------------------|-------------------------|-----------------------------|-----------------------------|-----------------------------|
| RASD2       | -0.1178752           | 0.13830088              | 0.43201646                  | 0.08385074                  | -0.0886446                  |
| RASSF1      | -0.0673257           | 0.02379431              | 0.29438571                  | 0.19844872                  | 0.29194001                  |
| RB1         | -0.0442015           | 0.23205132              | 0.10099208                  | 0.55454345                  | 0.04385785                  |
| RBBP6       | -0.0953639           | 0.27197011              | 0.39830436                  | -0.2874501                  | 0.51359538                  |
| RBCK1       | 0.01757941           | 0.35991668              | 0.31697998                  | 0.00404349                  | -0.0420172                  |
| RBX1        | -0.0951493           | 0.07456786              | 0.0228282                   | -0.1195309                  | -0.0697974                  |
| RC3H1       | 0.11781823           | 0.35367309              | 0.41000289                  | 0.54059406                  | 0.23737449                  |
| RC3H2       | -0.0919339           | 0.18410287              | 0.51891007                  | 0.44564325                  | 0.16016101                  |
| RCHY1       | -0.1655969           | 0.03145535              | 0.13574318                  | 0.1016888                   | 0.31753093                  |
| RELA        | 0.0051059            | 0.03116645              | 0.39197063                  | 0.25349611                  | 0.49306079                  |
| RFFL        | -0.2904998           | 0.10909307              | 0.01261111                  | 0.01790495                  | 0.0676067                   |
| RFPL1       | -0.1278472           | 0.11224914              | -0.1476752                  | 0.23009006                  | 0.285389                    |
| RFPL2       | -0.241564            | 0.11036837              | -0.0923085                  | -0.0245702                  | -0.004115                   |
| RFPL3       | -0.156124            | 0.15668662              | 0.26463053                  | 0.1036744                   | 0.15600691                  |
| RFPL4A      | -0.1545829           | 0.09383553              | 0.04380652                  | 0.18753117                  | 0.45820587                  |
| RFPL4B      | -0.1354686           | 0.28218871              | 0.29941669                  | -0.2446703                  | 0.27955616                  |
| RFWD2       | -0.4012775           | 0.07268265              | -0.1438872                  | -0.098876                   | 0.05717098                  |
| RFWD3       | -0.074038            | 0.2935363               | -0.1049132                  | 0.57351356                  | 0.03278849                  |
| RHOBTB1     | -0.3100623           | 0.13865661              | 0.1547078                   | -0.0480891                  | -0.2901408                  |
| RHOBTB3     | -0.1446084           | 0.29346667              | 0.31648536                  | -0.1235118                  | -0.3363753                  |
| RING1       | 0.1145938            | 0.20576254              | 0.18089698                  | 0.45365353                  | 0.94306296                  |
| RIPK1       | -0.0902704           | 0.11148416              | 0.05370045                  | 0.09962171                  | 0.38341399                  |
| RNF10       | -0.1108783           | 0.17132465              | -0.2242204                  | 0.35333979                  | 0.4238899                   |
| RNF103      | 0.14501537           | 0.39726414              | 0.1125972                   | 0.18681533                  | 1.17487401                  |
| RNF11       | -0.0977544           | 0.03988117              | 0.1967054                   | 0.10776055                  | 0.40113176                  |
| RNF111      | -0.3324352           | 0.25015773              | 0.25487023                  | -0.2300133                  | -0.070513                   |
| RNF112      | 0.04682568           | 0.15059185              | 0.49468763                  | -0.0252237                  | 0.62627595                  |
| RNF113A     | -0.0883501           | 0.22707372              | 0.41504258                  | 0.03580572                  | 0.14929216                  |
| RNF113B     | -0.2241405           | 0.30108141              | -0.0810043                  | -0.4064666                  | 0.45046125                  |
| RNF114      | -0.3551881           | 0.1762323               | -0.1349106                  | -0.0999548                  | 0.28506087                  |
| RNF115      | 0.06483974           | 0.51104249              | -0.0291948                  | -0.0803411                  | 0.9970788                   |
| RNF12       | -0.3756021           | 0.15618169              | -0.0386752                  | -0.2226828                  | -0.0366317                  |
| RNF121      | -0.1783908           | 0.09507021              | 0.01022769                  | 0.30302501                  | 0.17242346                  |
| RNF122      | -0.0577119           | 0.22243438              | 0.25863426                  | 0.14603246                  | 0.45451993                  |
| RNF123      | -0.2393302           | 0.14864565              | 0.23879861                  | 0.06738024                  | 0.06827823                  |
| RNF125      | 0.07238138           | 0.50359805              | 0.86471318                  | -0.3637081                  | 0.78571775                  |
| RNF126      | 0.05139491           | 0.08255523              | 0.19763956                  | 0.49047631                  | 0.51826571                  |
| RNF128      | -0.2795406           | 0.07881389              | 0.10799618                  | 0.09581421                  | -0.0525737                  |
| RNF13       | -0.1842426           | 0.07879464              | 0.02901012                  | -0.0881562                  | 0.13254632                  |
| RNF130      | -0.3514021           | 0.06729794              | 0.08959511                  | 0.11228894                  | -0.2421116                  |
| RNF133      | -0.1526768           | 0.13347905              | -0.0124632                  | 0.48445737                  | 0.21252981                  |
| RNF135      | -0.0249692           | 0.06015074              | 0.12871728                  | 0.178683                    | 0.44642734                  |
| RNF138      | 0.19991553           | 0.08728507              | 0.60130056                  | 0.96190221                  | 0.96466573                  |
| RNF139      | -0.152964            | 0.02799818              | 0.14313318                  | 0.03796171                  | 0.29267146                  |
| RNF14       | 0.01800552           | 0.11051513              | 0.17959307                  | 0.1739949                   | 0.63231592                  |
| RNF141      | -0.1606646           | 0.01877165              | 0.23230933                  | 0.51170826                  | 0.29803014                  |
| RNF144A     | -0.1738068           | 0.04521492              | -0.0160563                  | -0.0475604                  | 0.43178479                  |
| RNF144B     | 0.10455715           | 0.28869092              | 0.32923463                  | 0.16929581                  | 0.94983092                  |
| RNF145      | 0.04883405           | 0.17527707              | 0.19622813                  | 0.68359667                  | 0.34410667                  |
| RNF146      | -0.0824216           | 0.25305372              | 0.45210122                  | 0.18105521                  | 0.11360865                  |
| RNF148      | -0.0852168           | 0.42450623              | 0.40285721                  | -0.2331086                  | 0.44579202                  |
| RNF149      | -0.1731807           | 0.17741613              | 0.40123252                  | 0.101204                    | 0.24181035                  |
| RNF150      | -0.1384548           | 0.08611391              | 0.0730184                   | 0.65456603                  | 0.48336669                  |
| RNF151      | -0.079521            | 0.04291349              | 0.10226515                  | 0.27479785                  | 0.44988754                  |
| RNF152      | -0.0345308           | 0.19665678              | 0.21810827                  | 0.09921761                  | 0.88627043                  |
| RNF157      | -0.2486144           | 0.12451853              | 0.11332957                  | -0.0296917                  | 0.39321694                  |
| RNF160      | -0.2313916           | 0.24618838              | 0.45135164                  | -0.2802959                  | 0.02803808                  |
| RNF165      | 0.01690118           | 0.19393486              | 0.46324091                  | 0.08379969                  | 0.27528194                  |
| RNF166      | -0.2976411           | 0.06171447              | -0.3945034                  | -0.3307544                  | 0.23742445                  |
| RNF167      | -0.0834407           | 0.28673317              | 0.52394442                  | 0.26813992                  | 0.03752593                  |
| RNF168      | -0.2227094           | 0.09210899              | 0.06534103                  | -0.0386283                  | 0.1068191                   |
| RNF169      | -0.1994776           | 0.1809746               | 0.01315935                  | 0.04104716                  | 0.07005075                  |
| RNF17       | -0.371422            | 0.19284106              | -0.0730536                  | 0.07431946                  | -0.4498217                  |
| RNF170      | -0.1923899           | 0.13948424              | 0.17455414                  | 0.08429325                  | 0.24798866                  |
| RNF175      | -0.1340014           | 0.07113389              | 0.20355448                  | 0.2319612                   | 0.31382062                  |
| RNF180      | -0.0948555           | 0.49896106              | 0.86033395                  | -0.0289601                  | 0.10823122                  |
| RNF181      | -0.3630454           | 0.33781487              | -0.4675959                  | 0.19617395                  | 0.58282846                  |
| RNF182      | -0.098803            | 0.10275203              | 0.37681963                  | 0.17369423                  | 0.46327471                  |
| RNF183      | -0.3537235           | 0.21797401              | -0.4532051                  | -0.1943855                  | 0.49242059                  |
| RNF185      | -0.1561537           | 0.22138696              | 0.08503529                  | 0.02275427                  | 0.14333975                  |
| RNF186      | -0.0102298           | 0.09576096              | 0.39385928                  | 0.44700846                  | 0.59368932                  |
| RNF187      | -0.3345729           | 0.14368503              | -0.1704886                  | -0.0683885                  | -0.2754812                  |
| RNF19A      | -0.1911888           | 0.14259108              | 0.30918974                  | -0.1277759                  | 0.15758613                  |
| RNF19B      | -0.1180977           | 0.14157038              | 0.20423726                  | 0.17326534                  | 0.17456267                  |
| RNF2        | -0.0765789           | 0.09937163              | 0.02851724                  | 0.2366421                   | 0.52916297                  |
| RNF20       | -0.3941527           | 0.11258728              | -0.0154322                  | -0.0472111                  | -0.0811475                  |
| RNF207      | -0.1544772           | 0.07911034              | 0.1908553                   | 0.06940544                  | 0.30125637                  |
| RNF208      | -0.1756593           | 0.04564243              | -0.1382383                  | 0.03869468                  | 0.25048346                  |
| RNF212      | 0.05863117           | 0.03686471              | 0.49317137                  | 0.65317627                  | 0.5206346                   |
| RNF213      | -0.2428924           | 0.12555323              | 0.06685753                  | 0.18339351                  | -0.113024                   |
| RNF214      | -0.2079034           | 0.1243646               | 0.11360225                  | -0.0684837                  | 0.098513                    |
| RNF215      | 0.40980603           | 0.95639843              | 2.14383553                  | 0.48300344                  | 0.04101022                  |

| Gene symbol | Integrated intensity | SD Integrated intensity | Mean intensity replicate #1 | Mean intensity replicate #2 | Mean Intensity replicate #3 |
|-------------|----------------------|-------------------------|-----------------------------|-----------------------------|-----------------------------|
| RNF216      | -0.2113162           | 0.17153135              | 0.17652981                  | 0.22482511                  | 0.55652753                  |
| RNF217      | -0.177792            | 0.11198436              | 0.04659272                  | 0.41521147                  | 0.10385561                  |
| RNF219      | -0.2661552           | 0.2520173               | 0.30662472                  | -0.4670225                  | -0.042221                   |
| RNF220      | -0.2068007           | 0.06965817              | 0.08799043                  | 0.22245879                  | 0.0952888                   |
| RNF222      | 0.0765893            | 0.46318474              | 0.40247691                  | 0.09582258                  | 0.1569524                   |
| RNF24       | -0.2054406           | 0.1700075               | 0.16481147                  | 0.12794298                  | 0.02091528                  |
| RNF25       | -0.2227955           | 0.17522706              | -0.2246197                  | 0.38058966                  | -0.0731518                  |
| RNF26       | -0.1974062           | 0.23548259              | 0.3481786                   | -0.1574178                  | 0.17523634                  |
| RNF31       | -0.2923284           | 0.16010623              | -0.1495995                  | -0.3498293                  | 0.12767179                  |
| RNF32       | -0.2265753           | 0.08602133              | -0.1501647                  | 0.01085293                  | 0.44461299                  |
| RNF34       | 0.00685626           | 0.30266102              | -0.0591225                  | 0.89727875                  | 0.51770391                  |
| RNF38       | -0.2797856           | 0.21733956              | 0.16723244                  | -0.2137074                  | 0.04763129                  |
| RNF39       | 0.0113494            | 0.14599526              | 0.10256517                  | 0.96025354                  | 0.47157763                  |
| RNF4        | -0.0015878           | 0.28702509              | 0.36899576                  | -0.0135695                  | 1.11517974                  |
| RNF40       | -0.2065344           | 0.03440887              | -0.0652977                  | -0.0366644                  | 0.28480088                  |
| RNF41       | -0.2121907           | 0.02867329              | 0.04599323                  | 0.06478878                  | 0.26644458                  |
| RNF43       | 0.05298766           | 0.34369625              | 0.60255938                  | -0.1938018                  | 0.70266042                  |
| RNF44       | -0.0248113           | 0.27524265              | -0.1175616                  | 0.17696846                  | 0.4595975                   |
| RNF5        | -0.142447            | 0.2654785               | 0.0550458                   | -0.3266757                  | 0.80515984                  |
| RNF6        | -0.0264941           | 0.11551373              | 0.11993024                  | 0.05352639                  | 0.87513609                  |
| RNF7        | 0.33957279           | 0.42075158              | 1.13109262                  | 0.3198789                   | 0.42588172                  |
| RNF8        | -0.1625199           | 0.21875382              | 0.18513959                  | 0.0427257                   | 0.08771452                  |
| RNFT1       | -0.0276952           | 0.15540419              | 0.37151192                  | 0.40365864                  | 0.43531956                  |
| RNFT2       | -0.0766568           | 0.42055449              | 0.59053105                  | -0.278747                   | 0.18005612                  |
| RPA2        | -0.0888894           | 0.01110479              | 0.06199715                  | 0.07240279                  | 0.27584551                  |
| RPL13A      | -0.0777124           | 0.17106435              | -0.002392                   | 0.1703694                   | 0.45989168                  |
| RPLP0       | 1.63818124           | 0.46634545              | 2.46642764                  | 1.25414135                  | 2.70281137                  |
| RPS27A      | -0.089955            | 0.15048687              | 0.12210543                  | 0.38245682                  | 0.60823354                  |
| RSPRY1      | -0.0201015           | 0.1268958               | 0.08009183                  | 0.50012658                  | 0.3384868                   |
| RUSC1       | 0.14433016           | 0.41358234              | 0.70166722                  | 0.3196497                   | 0.07673296                  |
| RYBP        | -0.1405979           | 0.35946896              | 0.44680087                  | 0.37788816                  | -0.2617185                  |
| SAE1        | -0.077564            | 0.12775232              | 0.05503551                  | 0.27994765                  | 0.71147259                  |
| SASH1       | -0.1173888           | 0.14232124              | -0.1320032                  | 0.04598479                  | 0.47423309                  |
| SCAMP3      | -0.2114163           | 0.21402103              | 0.06849711                  | 0.30398611                  | -0.0930743                  |
| SCN5A       | -0.1246003           | 0.06609993              | 0.07860297                  | -0.0302755                  | 0.35102498                  |
| SEPT4       | -0.03662             | 0.343636                | 0.619768                    | 0.089992                    | 0.137388                    |
| SH3RF1      | -0.1094209           | 0.18174533              | 0.38771998                  | 0.68513105                  | 0.03904216                  |
| SH3RF2      | 0.07390833           | 0.24630319              | 0.3562922                   | 0.16468315                  | 0.45167862                  |
| SH3RF3      | -0.138367            | 0.14715163              | 0.11759756                  | 0.1012961                   | 0.63049572                  |
| SHARPIN     | 0.00021135           | 0.02626154              | 0.29447569                  | 0.52119322                  | 0.45052889                  |
| SHPRH       | -0.0864314           | 0.15553551              | 0.32257155                  | 0.48902269                  | 0.11982506                  |
| SIAH1       | 0.11024875           | 0.12870396              | 0.52096596                  | 0.60297963                  | 0.81303292                  |
| SIAH2       | 0.2604934            | 0.19790578              | 0.44157513                  | 0.45893578                  | 1.27123042                  |
| SIRT1       | -0.212556            | 0.18730049              | -0.2576078                  | 0.00659419                  | 0.13700798                  |
| SIRT2       | -0.2486877           | 0.12949564              | -0.1405188                  | 0.02716202                  | -0.2052684                  |
| SKI         | -0.0644923           | 0.03026957              | 0.33113391                  | 0.06796745                  | 0.52000968                  |
| SKP1        | 0.05951172           | 0.40552789              | 0.09840381                  | 0.82567885                  | 0.51640832                  |
| SKP2        | 0.09307347           | 0.07873174              | 0.26946685                  | 0.35971195                  | 0.56022959                  |
| SLC22A18    | 0.086912             | 0.267447                | 0.356163                    | 0.184872                    | 1.10698                     |
| SMAD2       | 0.176615             | 0.176039                | 0.20688                     | 0.357782                    | 1.09447                     |
| SMAD3       | 0.003465             | 0.072341                | 0.137309                    | 0.220335                    | 0.481053                    |
| SMAD5       | -0.17823             | 0.1754                  | -0.18077                    | 0.213904                    | 0.52753                     |
| SMAD6       | -0.05536             | 0.127516                | 0.257099                    | -0.09137                    | 0.504536                    |
| SMAD7       | -0.00326             | 0.181098                | 0.402119                    | 0.252225                    | 0.175438                    |
| SMURF1      | 0.04310002           | 0.1699526               | 0.02898267                  | 0.70264288                  | 0.30399898                  |
| SMURF2      | 0.08288841           | 0.36831547              | 0.19397721                  | 1.00616186                  | 0.08503424                  |
| SNCAIP      | -0.1693716           | 0.09414989              | -0.0858109                  | 0.19922057                  | 0.24847841                  |
| SNX9        | 0.09746471           | 0.22917161              | 0.34604171                  | 0.39623389                  | 0.72849379                  |
| SOCS1       | -0.099486            | 0.08335925              | 0.11355188                  | 0.1328131                   | 0.27005954                  |
| SOCS2       | -0.0814123           | 0.13984662              | 0.47115371                  | 0.10284855                  | 0.21708668                  |
| SOCS3       | -0.0580834           | 0.15908132              | -0.0207293                  | 0.11808241                  | 0.41865344                  |
| SOCS4       | -0.217344            | 0.07844099              | -0.0254506                  | -0.0144859                  | 0.23987595                  |
| SOCS5       | -0.0817849           | 0.07386844              | 0.16552138                  | 0.2077196                   | 0.43539372                  |
| SOCS6       | -0.0835914           | 0.13844349              | 0.51573915                  | -0.1127589                  | 0.14624626                  |
| SOCS7       | -0.203287            | 0.0445795               | 0.1260155                   | 0.24073676                  | 0.30945717                  |
| SPG20       | -0.1148204           | 0.09407814              | 0.10386795                  | 0.04336876                  | 0.21370342                  |
| SPOP        | -0.1609126           | 0.071266                | 0.04545887                  | 0.15377534                  | 0.13403145                  |
| SPOPL       | -0.23122             | 0.18188166              | -0.1362748                  | -0.0325137                  | 0.42976852                  |
| SPRYD5      | -0.1731243           | 0.2041415               | 0.2848852                   | 0.02775511                  | 0.09339605                  |
| SPSB1       | 0.13084234           | 0.14800783              | 0.08601347                  | 0.65237754                  | 0.52069847                  |
| SPSB2       | -0.068854            | 0.18462462              | 0.48952139                  | 0.09555086                  | 0.40232092                  |
| SPSB3       | 1.22536009           | 0.23396401              | 1.6579091                   | 1.69887436                  | 1.72729329                  |
| SPSB4       | -0.0613112           | 0.06113798              | -0.1512092                  | 0.45089105                  | 0.85957207                  |
| SQSTM1      | -0.1773269           | 0.17533446              | -0.0043084                  | 0.33881948                  | 0.05879786                  |
| STUB1       | -0.2031472           | 0.04716125              | 0.21335654                  | -0.0647894                  | -0.1113017                  |
| STX8        | -0.2276809           | 0.13744094              | -0.0560437                  | 0.18474148                  | -0.1239883                  |
| SUGT1       | -0.2068594           | 0.13453686              | 0.16677912                  | 0.20310116                  | -0.0552677                  |
| SUMO1       | -0.09526             | 0.18254575              | 0.52186191                  | 0.21717271                  | 0.06840828                  |
| SUMO2       | -0.1344518           | 0.13707819              | 0.05519409                  | 0.31950875                  | 0.78328467                  |
| SUZ12       | -0.1461887           | 0.0550644               | 0.17443425                  | 0.09078136                  | 0.41981449                  |
| SYTL4       | -0.5133112           | 0.16949633              | -0.3859351                  | -0.3439145                  | -0.0699707                  |
| SYVN1       | -0.1349862           | 0.24104399              | 0.09583172                  | -0.0681917                  | -0.0242149                  |

| Gene symbol  | Integrated intensity | SD Integrated intensity | Mean intensity replicate #1 | Mean intensity replicate #2 | Mean Intensity replicate #3 |
|--------------|----------------------|-------------------------|-----------------------------|-----------------------------|-----------------------------|
| TANK         | -0.2377573           | 0.1064623               | -0.0481688                  | 0.21744577                  | 0.06066882                  |
| TBC1D7       | -0.1253855           | 0.12988725              | 0.42975491                  | 0.228969                    | 0.13491016                  |
| TCEB1        | 0.72047487           | 0.04405397              | 0.96610756                  | 1.23696367                  | 1.64337885                  |
| TCEB2        | 0.739004             | 0.35460035              | 0.86567328                  | 0.96367565                  | 2.54255792                  |
| TCEB3B       | -0.047998            | 0.05451772              | 0.27184778                  | 0.37081476                  | 0.52304311                  |
| TCEB3C       | 0.03756603           | 0.15618026              | 0.22009934                  | 0.25096655                  | 0.58886611                  |
| TCP1         | 0.4695794            | 0.11201262              | 0.53349611                  | 0.88077848                  | 1.11426991                  |
| TEX14        | -0.1704708           | 0.06679963              | 0.04131491                  | 0.10332255                  | 0.00939629                  |
| TMBIM6       | 0.11728714           | 0.17945248              | 0.30463068                  | 0.36810979                  | 0.91753708                  |
| TMEM129      | 0.0901471            | 0.33860225              | 0.14064083                  | 1.17358287                  | 0.32051767                  |
| TMEM173      | -0.1315049           | 0.14138906              | -0.1547986                  | 0.2500617                   | 0.56487816                  |
| TMEM189      | 0.04617152           | 0.5499174               | 0.11119532                  | 0.08007921                  | 1.63511551                  |
| TNFAIP1      | 0.03598941           | 0.05533914              | 0.22313918                  | 0.26404305                  | 0.33820991                  |
| TNFAIP3      | -0.0746396           | 0.261674                | 0.4041864                   | 0.10989432                  | 0.01354534                  |
| TNFRSF14     | -0.2992377           | 0.12233323              | 0.00351867                  | 0.05140684                  | -0.2023414                  |
| TNFRSF1B     | -0.088647            | 0.10156243              | 0.26069626                  | 0.22185101                  | 0.61300137                  |
| TNIP1        | -0.2450096           | 0.17372635              | 0.26633873                  | 0.11645043                  | -0.1191671                  |
| TNIP2        | -0.1213025           | 0.19814116              | -0.009214                   | 0.03777142                  | 0.13198805                  |
| TNIP3        | -0.2283933           | 0.18229192              | 0.04389947                  | 0.52160465                  | -0.0140059                  |
| TNKS         | -0.127589            | 0.0936367               | 0.20914894                  | 0.23748142                  | 0.22955855                  |
| TNKS2        | -0.1802148           | 0.43470325              | -0.2864881                  | 0.55097239                  | -0.0475042                  |
| TOLLIP       | -0.1923792           | 0.22228241              | 0.40879452                  | 0.0385592                   | 0.21236099                  |
| TOM1L1       | 0.07321954           | 0.34666559              | 0.70331851                  | 0.19368569                  | 0.02542617                  |
| TOP2A        | 0.08874573           | 0.33477369              | 0.03982677                  | 0.13510092                  | 0.79472222                  |
| TOPORS       | -0.0675922           | 0.2038658               | 0.18096763                  | 0.0848083                   | 0.62731377                  |
| TPP2         | 0.19302106           | 0.42092024              | 0.79950038                  | 0.32122571                  | 0.65375149                  |
| TRAF1        | -0.169182            | 0.123747                | 0.10518513                  | 0.06487983                  | 0.37236535                  |
| TRAF2        | -0.3704612           | 0.30517968              | -0.5516487                  | 0.17085701                  | 0.03630913                  |
| TRAF3        | -0.0656589           | 0.22191791              | 0.21420407                  | -0.019189                   | -0.1270557                  |
| TRAF4        | -0.0943778           | 0.2815339               | -0.1561277                  | 0.13000211                  | 0.7284167                   |
| TRAF5        | -0.0412152           | 0.31505688              | 0.15861785                  | 0.17771296                  | 0.03475636                  |
| TRAF6        | -0.2002234           | 0.04776396              | 0.07584465                  | 0.01504368                  | 0.34097819                  |
| TRAF7        | -0.1577921           | 0.17959871              | 0.06568393                  | 0.44242528                  | 0.08268982                  |
| TRAIP        | -0.1461988           | 0.05327848              | -0.0761749                  | 0.18289175                  | 0.25543349                  |
| TREX1        | -0.2685975           | 0.16609141              | 0.0755318                   | 0.05547417                  | -0.2735285                  |
| TRIB1        | -0.1111177           | 0.16578119              | 0.44923401                  | 0.19277267                  | 0.02300185                  |
| TRIB2        | 0.2653508            | 0.16195492              | 0.57767382                  | 0.54639547                  | 0.68402263                  |
| TRIB3        | 0.13931999           | 0.3419064               | 0.17192168                  | 1.35893877                  | 0.20392345                  |
| TRIM10       | -0.2525158           | 0.19677946              | 0.09279746                  | 0.18814974                  | -0.08495                    |
| TRIM11       | -0.1256907           | 0.11131163              | -0.1024438                  | 0.09547896                  | 0.30118854                  |
| TRIM13       | -0.2538926           | 0.12785019              | -0.0163703                  | 0.11087929                  | 0.03105937                  |
| TRIM15       | -0.1381113           | 0.32788941              | 0.10687627                  | 0.31309446                  | -0.4492114                  |
| TRIM17       | -0.1483291           | 0.56513789              | 0.65476276                  | -0.3959565                  | 0.20025943                  |
| TRIM2        | -0.1159352           | 0.08414028              | 0.21141019                  | 0.04070225                  | 0.22853362                  |
| TRIM21       | -0.0207301           | 0.1593124               | 0.10540181                  | 0.16817996                  | 1.05844982                  |
| TRIM22       | 0.00220698           | 0.35514244              | 0.61471121                  | 0.23103617                  | -0.1287439                  |
| TRIM23       | -0.0563274           | 0.17680044              | 0.25777634                  | 0.3672587                   | -0.012017                   |
| TRIM24       | -0.1065297           | 0.32104                 | 0.56501438                  | 0.1911668                   | -0.1433627                  |
| TRIM25       | 0.1437916            | 0.2814339               | 0.30511769                  | 0.05382571                  | 0.83883632                  |
| TRIM26       | 0.0438176            | 0.28399224              | 0.32227982                  | -0.1020312                  | 0.55788243                  |
| TRIM27       | -0.1441664           | 0.16189237              | -0.1470892                  | 0.29948513                  | 0.36962145                  |
| TRIM28       | -0.2213065           | 0.04460922              | 0.03085481                  | -0.0305289                  | 0.07996228                  |
| TRIM3        | -0.2659931           | 0.07841906              | -0.0982723                  | -0.0251541                  | -0.1282485                  |
| TRIM31       | -0.1351689           | 0.50523734              | 0.49022299                  | 0.45866172                  | -0.4243792                  |
| TRIM32       | -0.2475377           | 0.31838449              | 0.26350028                  | 0.07952378                  | -0.4524258                  |
| TRIM33       | -0.2127006           | 0.05730927              | 0.26665212                  | -0.0939017                  | 0.19152869                  |
| TRIM35       | -0.2070228           | 0.20236156              | 0.11631632                  | 0.24298341                  | -0.2293971                  |
| TRIM36       | -0.2290559           | 0.16145854              | 0.15417766                  | 0.19702352                  | -0.0609206                  |
| TRIM37       | -0.17193             | 0.104598                | 0.046956                    | -0.06506                    | 0.596533                    |
| TRIM38       | -0.2672593           | 0.20822282              | -0.1529031                  | -0.0865382                  | 0.39000717                  |
| TRIM39       | -0.1376507           | 0.30235421              | 0.21737646                  | 0.77384235                  | -0.0578155                  |
| TRIM4        | -0.0457194           | 0.04662189              | 0.18102462                  | 0.00749669                  | 0.30670896                  |
| TRIM40       | -0.1742609           | 0.04944998              | 0.02224483                  | 0.23358021                  | 0.35871165                  |
| TRIM41       | -0.1527733           | 0.25052841              | 0.23788706                  | -0.1880103                  | 0.35575721                  |
| TRIM42       | -0.1669484           | 0.15355881              | 0.24236646                  | 0.13410544                  | 0.19645073                  |
| TRIM43       | 0.10034556           | 0.23574377              | 0.39341264                  | 0.80257445                  | 0.31722404                  |
| TRIM44       | -0.0776609           | 0.26584242              | 0.35784233                  | -0.0321919                  | 0.55508806                  |
| TRIM45       | -0.2057066           | 0.07158116              | 0.05014691                  | 0.33954626                  | -0.0795354                  |
| TRIM46       | -0.167117            | 0.34641444              | -0.2068982                  | 0.82606931                  | -0.0851087                  |
| TRIM47       | -0.0735512           | 0.14651203              | 0.17074064                  | 0.54404161                  | 0.21003228                  |
| TRIM48       | 0.060106             | 0.6362428               | -0.3913674                  | 1.55125431                  | 0.35678234                  |
| TRIM49       | -0.3722199           | 0.10582778              | -0.1042664                  | 0.01421694                  | -0.1550343                  |
| TRIM5        | 0.0913684            | 0.34236154              | 0.17523571                  | 0.98117424                  | -0.1033456                  |
| TRIM50       | -0.197955            | 0.18145979              | 0.20254822                  | 0.29826073                  | -0.0482923                  |
| TRIM52       | -0.1848239           | 0.19702732              | -0.2505953                  | 0.28162545                  | 0.21522187                  |
| TRIM54       | -0.1247205           | 0.24267843              | 0.26922215                  | 0.72023935                  | -0.1366426                  |
| TRIM55       | -0.049242            | 0.09474929              | 0.35585024                  | 0.25221839                  | 0.42281898                  |
| TRIM56       | -0.045471            | 0.12693934              | 0.17917136                  | 0.25462677                  | 0.42011308                  |
| TRIM58       | -0.2159531           | 0.10255017              | 0.09527811                  | -0.1471038                  | 0.28150699                  |
| TRIM59       | -0.0391813           | 0.03812265              | 0.2047458                   | 0.49142013                  | 0.3801214                   |
| TRIM6        | -0.1874752           | 0.38494414              | 0.15517844                  | -0.4713793                  | 0.25234543                  |
| TRIM6-TRIM34 | -0.1627504           | 0.29810092              | -0.239337                   | 0.0769116                   | 0.73938675                  |

| Gene symbol | Integrated intensity | SD Integrated intensity | Mean intensity replicate #1 | Mean intensity replicate #2 | Mean Intensity replicate #3 |
|-------------|----------------------|-------------------------|-----------------------------|-----------------------------|-----------------------------|
| TRIM60      | -0.2328472           | 0.14992466              | -0.0249433                  | -0.0412196                  | 0.47423922                  |
| TRIM61      | 0.15806085           | 0.56947849              | 0.14087631                  | 0.01279486                  | 1.23913636                  |
| TRIM62      | -0.0255092           | 0.33432165              | 0.37471444                  | -0.2265807                  | 0.69619616                  |
| TRIM63      | 0.04547589           | 0.31734935              | 0.2538299                   | 0.22464908                  | 1.10743474                  |
| TRIM65      | -0.1823318           | 0.10016682              | -0.0225771                  | 0.28710265                  | 0.22370372                  |
| TRIM67      | -0.2216426           | 0.19307906              | 0.22284735                  | -0.0847336                  | -0.0679002                  |
| TRIM68      | 0.12253974           | 0.42946705              | 1.06260771                  | 0.26312065                  | -0.0695777                  |
| TRIM69      | -0.0402458           | 0.19283901              | -0.2362152                  | 0.19888322                  | 0.78587341                  |
| TRIM7       | -0.1176843           | 0.27137978              | -0.3588444                  | 0.30433036                  | 0.74644469                  |
| TRIM71      | 0.00834568           | 0.18886749              | -0.0532259                  | 0.18204208                  | 0.59576175                  |
| TRIM72      | 0.27032094           | 0.37059756              | 0.17844613                  | 1.36162495                  | 0.47418711                  |
| TRIM73      | 0.0853172            | 0.53458487              | 1.15507843                  | 0.10299628                  | 0.51640487                  |
| TRIM74      | -0.1800957           | 0.13015616              | 0.28236163                  | 0.06212429                  | 0.28358462                  |
| TRIM8       | 0.18608945           | 0.6425995               | 0.64468743                  | -0.1364845                  | 0.68180887                  |
| TRIM9       | 0.07040745           | 0.22541532              | 0.27714353                  | 0.1222079                   | 0.58782562                  |
| TRIML1      | -0.1873742           | 0.26589868              | -0.3452519                  | 0.54773689                  | 0.40330296                  |
| TRIML2      | 0.0446496            | 0.22300251              | 0.40350224                  | 0.25640108                  | 0.32007199                  |
| TRIOBP      | 0.12573764           | 0.60726785              | -0.0893602                  | 0.08104945                  | 1.09447755                  |
| TRIP12      | 0.26450929           | 0.11296638              | 0.5605126                   | 0.54611454                  | 0.67809841                  |
| TRPC4AP     | -0.1728027           | 0.04551161              | 0.13863608                  | 0.11349852                  | 0.15192398                  |
| TSG101      | -0.0946246           | 0.05601519              | 0.122983                    | 0.12354114                  | 0.54331749                  |
| TSPAN17     | -0.2364473           | 0.12962878              | 0.0837384                   | 0.22013828                  | -0.0982014                  |
| TSPYL5      | -0.2493473           | 0.19299317              | -0.0462644                  | -0.0989564                  | -0.01882                    |
| TTC3        | -0.1296427           | 0.17617599              | -0.115589                   | 0.16002402                  | 0.46316177                  |
| TTK         | 0.0125232            | 0.05262269              | 0.24439933                  | 0.22742005                  | 0.48128787                  |
| TUBA1B      | -0.0547182           | 0.05828385              | 0.20200083                  | 0.10655828                  | 0.41589955                  |
| TUBB        | 0.15447074           | 0.22966242              | 0.33394857                  | 0.34350039                  | 0.55052058                  |
| TULP4       | -0.0486431           | 0.33980843              | 0.06310259                  | 0.79609098                  | -0.1213556                  |
| TXNIP       | -0.015276            | 0.14526426              | 0.08264993                  | 0.38195205                  | 0.30970154                  |
| UBA1        | -0.1922696           | 0.10257608              | 0.14859249                  | 0.04896819                  | 0.33050063                  |
| UBA2        | 0.06651225           | 0.18536015              | 0.72058032                  | 0.13539587                  | 0.58804919                  |
| UBA3        | 0.20723616           | 0.47267853              | 0.2580321                   | 0.0832031                   | 1.2801455                   |
| UBA5        | -0.1118429           | 0.17425138              | 0.50139883                  | 0.45192907                  | 0.05527378                  |
| UBA52       | 0.1162799            | 0.2608738               | 0.6182278                   | 0.14286805                  | 0.79029057                  |
| UBA6        | -0.2076182           | 0.24687076              | -0.2836963                  | 0.66069337                  | 0.04947707                  |
| UBA7        | -0.1553128           | 0.33281662              | 0.16769623                  | 0.33225165                  | -0.2661995                  |
| UBAC1       | -0.3068032           | 0.16421499              | -0.1524336                  | 0.21707346                  | -0.1636308                  |
| UBAP1       | -0.2112112           | 0.16880673              | 0.18625523                  | 0.12562583                  | -0.0475367                  |
| UBB         | -0.1589872           | 0.11567232              | 0.35107985                  | 0.09060243                  | 0.0312942                   |
| UBC         | 0.91131933           | 0.99380665              | 0.17630769                  | 1.23716596                  | 2.50529487                  |
| UBD         | 0.14659976           | 0.21485475              | 0.51433387                  | 0.20535099                  | 0.98746636                  |
| UBE2A       | -0.2091105           | 0.06751907              | -0.0004284                  | 0.05310404                  | 0.25331411                  |
| UBE2B       | 0.13753827           | 0.41345672              | 0.78724413                  | 0.33860173                  | 0.10492216                  |
| UBE2C       | -0.2240304           | 0.20374073              | -0.4063582                  | 0.09417855                  | 0.50213088                  |
| UBE2D1      | -0.1070144           | 0.27350482              | 0.11353288                  | -0.0221008                  | 0.95612666                  |
| UBE2D2      | -0.1116549           | 0.05625528              | 0.23400765                  | 0.15177824                  | 0.48551906                  |
| UBE2D3      | -0.0918489           | 0.3538929               | -0.011046                   | -0.2443617                  | 0.93333578                  |
| UBE2D4      | 0.00200273           | 0.48366212              | 0.17620673                  | -0.1413907                  | 0.93652252                  |
| UBE2E1      | -0.2013295           | 0.06259916              | -0.0684059                  | 0.01210935                  | 0.30098999                  |
| UBE2E2      | 0.1245791            | 0.26018195              | 0.79514055                  | 0.06087896                  | 0.58425662                  |
| UBE2E3      | -0.2228893           | 0.05344564              | -0.1986715                  | 0.07068854                  | 0.18474845                  |
| UBE2F       | 0.91889909           | 0.81050831              | 2.36612274                  | 0.64416511                  | 1.73668924                  |
| UBE2G1      | 0.03022199           | 0.29663028              | 0.86520083                  | -0.014464                   | 0.5948692                   |
| UBE2G2      | 0.03053837           | 0.37612481              | 0.80702798                  | 0.12285632                  | 0.16562293                  |
| UBE2H       | -0.1384963           | 0.08589677              | 0.04110318                  | -0.003445                   | 0.43754737                  |
| UBE2HP      | -0.0155334           | 0.23702571              | 0.2936559                   | 0.11829547                  | 0.50565007                  |
| UBE2I       | -0.1296815           | 0.2026657               | -0.2578504                  | 0.45654959                  | 0.63682552                  |
| UBE2J1      | -0.1014304           | 0.10776145              | 0.06938343                  | 0.16994216                  | 0.30514835                  |
| UBE2J2      | -0.3072025           | 0.07647425              | -0.3136413                  | 0.18887631                  | -0.375881                   |
| UBE2K       | -0.2099214           | 0.05365549              | 0.25940745                  | -0.0267328                  | 0.51206196                  |
| UBE2L3      | -0.0843478           | 0.14453571              | 0.11081961                  | 0.30369773                  | 0.5582067                   |
| UBE2L6      | -0.1635555           | 0.13839554              | 0.03997155                  | -0.1451469                  | 0.19622306                  |
| UBE2M       | -0.2064639           | 0.18651156              | 0.01916308                  | 0.14033125                  | -0.2466518                  |
| UBE2N       | -0.2271866           | 0.17624022              | 0.19688092                  | 0.29419854                  | 0.13518264                  |
| UBE2NL      | -0.0407124           | 0.3380545               | 0.53243093                  | -0.1295076                  | 0.79907026                  |
| UBE2O       | -0.2569576           | 0.17311943              | -0.1847839                  | 0.52043602                  | 0.18490941                  |
| UBE2Q1      | -0.2195678           | 0.15153984              | -0.235226                   | 0.11514976                  | -0.0343018                  |
| UBE2Q2      | -0.1325134           | 0.06974725              | 0.09670613                  | 0.35837058                  | 0.06352161                  |
| UBE2R2      | -0.0419341           | 0.15863074              | 0.40810414                  | 0.15709947                  | 0.15991871                  |
| UBE2S       | 0.01440213           | 0.26475339              | 0.51124894                  | 0.1980003                   | 0.06434754                  |
| UBE2T       | -0.0803354           | 0.26873655              | 0.44509168                  | -0.0242058                  | 0.23510855                  |
| UBE2U       | -0.3545245           | 0.22728188              | -0.0939985                  | 0.05475179                  | -0.5604236                  |
| UBE2V1      | -0.3056113           | 0.09829299              | -0.0612869                  | 0.1041357                   | 0.12472105                  |
| UBE2V2      | -0.1359243           | 0.11664151              | 0.02002452                  | 0.18074729                  | 0.53822164                  |
| UBE2W       | -0.1636918           | 0.16528577              | 0.13649341                  | 0.44081848                  | -0.2389456                  |
| UBE2Z       | -0.0311751           | 0.02832089              | 0.06280149                  | 0.22232964                  | 0.39355283                  |
| UBE3A       | -0.3296472           | 0.03804037              | -0.2568921                  | -0.1993787                  | -0.1097899                  |
| UBE3B       | -0.1649284           | 0.20156281              | 0.26402181                  | -0.031771                   | 0.08264352                  |
| UBE3C       | -0.0882428           | 0.08604224              | 0.00139943                  | 0.12370246                  | 0.26112168                  |
| UBE3D       | -0.0819751           | 0.0985173               | 0.06316895                  | 0.09926475                  | 0.2350979                   |
| UBE4A       | -0.1386919           | 0.06697293              | 0.09252295                  | 0.29802903                  | 0.33422889                  |
| UBE4B       | -0.1265904           | 0.09891709              | 0.05007136                  | 0.23115135                  | -0.0960243                  |
